# Supplementary material for: Early classification of spatio-temporal events using partial information
Source: PLoS One. 2020 Aug 5;15(8):e0236331. doi: 10.1371/journal.pone.0236331 (PMC7406362; doi:10.1371/journal.pone.0236331)
Supplement: S2 File — (R) [file pone.0236331.s002.zip]

Archive with 62 entries (61 files):
- Graphics/
- Graphics/2_A_Blobs_labels.pdf
- Graphics/3_B_Blobs_labels.pdf
- Graphics/4Fold_CV.pdf
- Graphics/Actual_vs_Detected.png
- Graphics/changepoint1.pdf
- Graphics/changepoint2.pdf
- Graphics/Clusters_NO2_June_2018_With_Bndry.pdf
- Graphics/Clusters_NO2_March_2018_With_Bndry.pdf
- Graphics/Events_100040.pdf
- Graphics/Events_100044.pdf
- Graphics/Events_Detected_Synth.png
- Graphics/event_background_1.png
- Graphics/event_background_2.png
- Graphics/Event_Comparison_121_160.pdf
- Graphics/Event_Comparison_161_200.pdf
- Graphics/Event_Comparison_1_40.pdf
- Graphics/Event_Comparison_201_240.pdf
- Graphics/Event_Comparison_241_280.pdf
- Graphics/Event_Comparison_281_320.pdf
- Graphics/Event_Comparison_321_360.pdf
- Graphics/Event_Comparison_361_379.pdf
- Graphics/Event_Comparison_41_80.pdf
- Graphics/Event_Comparison_81_120.pdf
- Graphics/Event_comparison_Synthetic_101_150.pdf
- Graphics/Event_comparison_Synthetic_151_200.pdf
- Graphics/Event_comparison_Synthetic_1_50.pdf
- Graphics/Event_comparison_Synthetic_251_300.pdf
- Graphics/Event_comparison_Synthetic_301_350.pdf
- Graphics/Event_comparison_Synthetic_51_100.pdf
- Graphics/Event_end_distribution.png
- Graphics/Event_start_distribution.png
- Graphics/fast_evolving.png
- Graphics/Image_for_Splines.pdf
- Graphics/Nemenyi_Accuracy_NO2.pdf
- Graphics/Nemenyi_PPV_Fibre.pdf
- Graphics/Nemenyi_ROC_Fibre.pdf
- Graphics/Nemenyi_Synthetic_Accuracy.pdf
- Graphics/NO2_Event_Comparison_181_270_2.pdf
- Graphics/NO2_Event_Comparison_1_90_2.pdf
- Graphics/NO2_Event_Comparison_271_360_2.pdf
- Graphics/NO2_Event_Comparison_91_180_2.pdf
- Graphics/NO2_March_2018_With_Bndry.pdf
- Graphics/Parameters.png
- Graphics/Raw_Synth_1.png
- Graphics/real_data_location_cpts.pdf
- Graphics/real_data_time_cpts.pdf
- Graphics/Real_World.pdf
- Graphics/Real_World_stream.pdf
- Graphics/sd_1234_clusters_detected_rolling_100.png
- Graphics/sd_1234_clusters_detected_rolling_50.png
- Graphics/sd_1234_clusters_detected_rolling_75.png
- Graphics/sd_1234_with_window.png
- Graphics/sensitivity_event_detection.png
- Graphics/sensitivity_mu_11_sd_11.png
- Graphics/Spline_IQR.pdf
- Graphics/Spline_Median.pdf
- Graphics/synthetic_data_for_tradeoff.png
- Graphics/Time_Comparison.pdf
- Graphics/tradeoff_lambda.png
- Graphics/True_Events_Synth.png
- Graphics/Two_Event_Features.pdf
