# Supplementary figures and images for: Early classification of spatio-temporal events using partial information
Source: PLOS journal article supplement (doi:10.1371/journal.pone.0236331), 2020-08-05

# Nemenyi test ranks using PPV

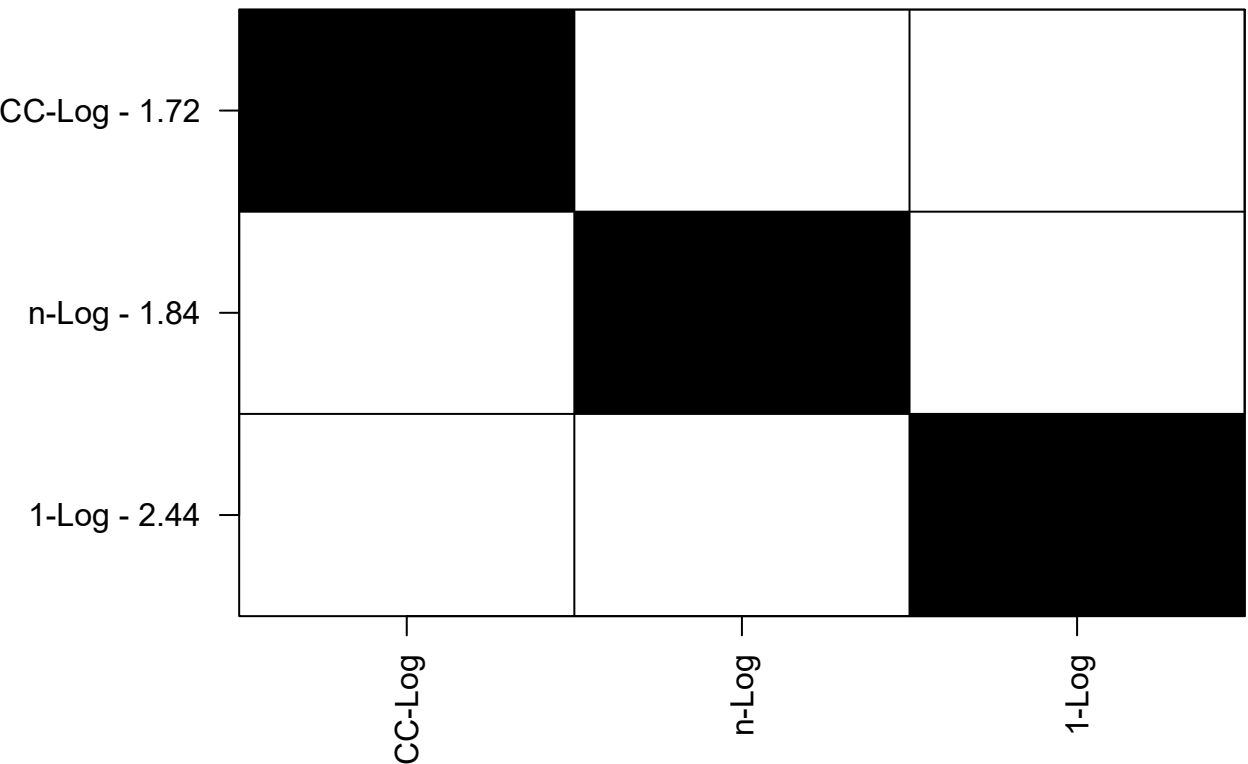

Supplement: S2 (10.1371/journal.pone.0236331.s002) [file journal.pone.0236331.s002]

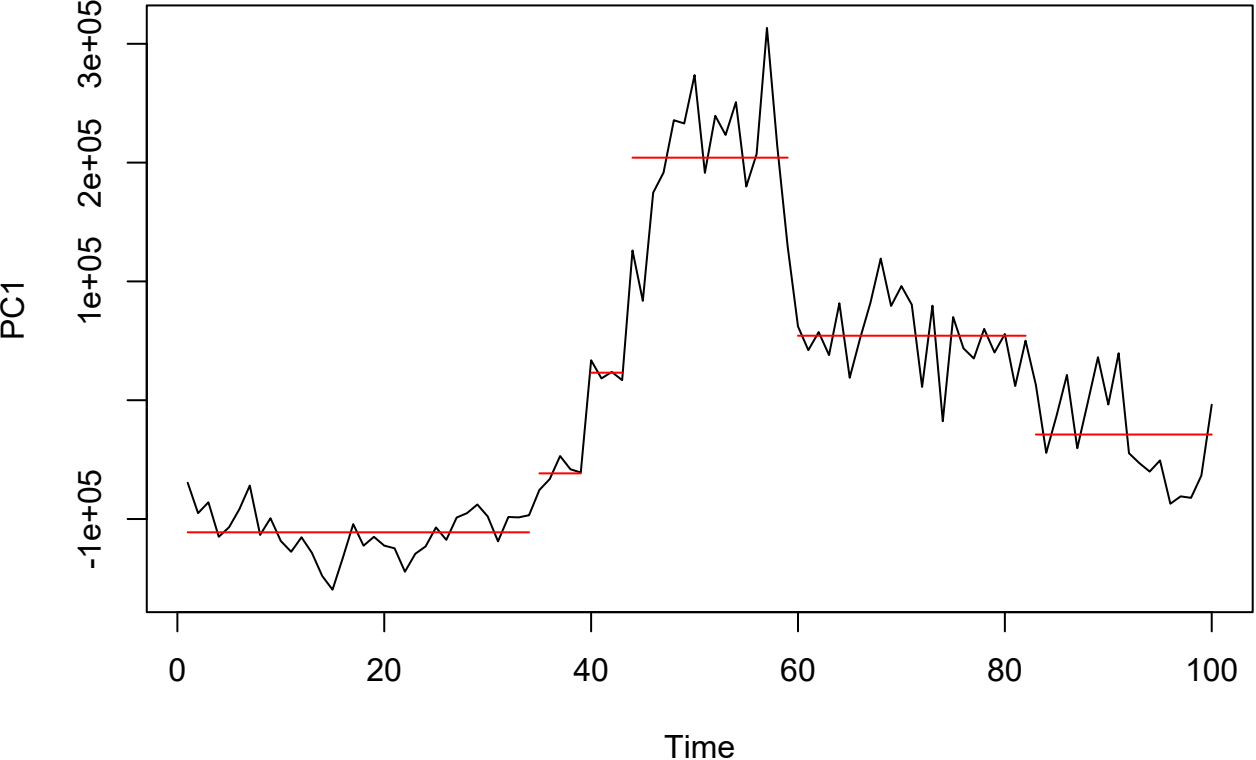

Supplement: S2 (10.1371/journal.pone.0236331.s002) [file journal.pone.0236331.s002]

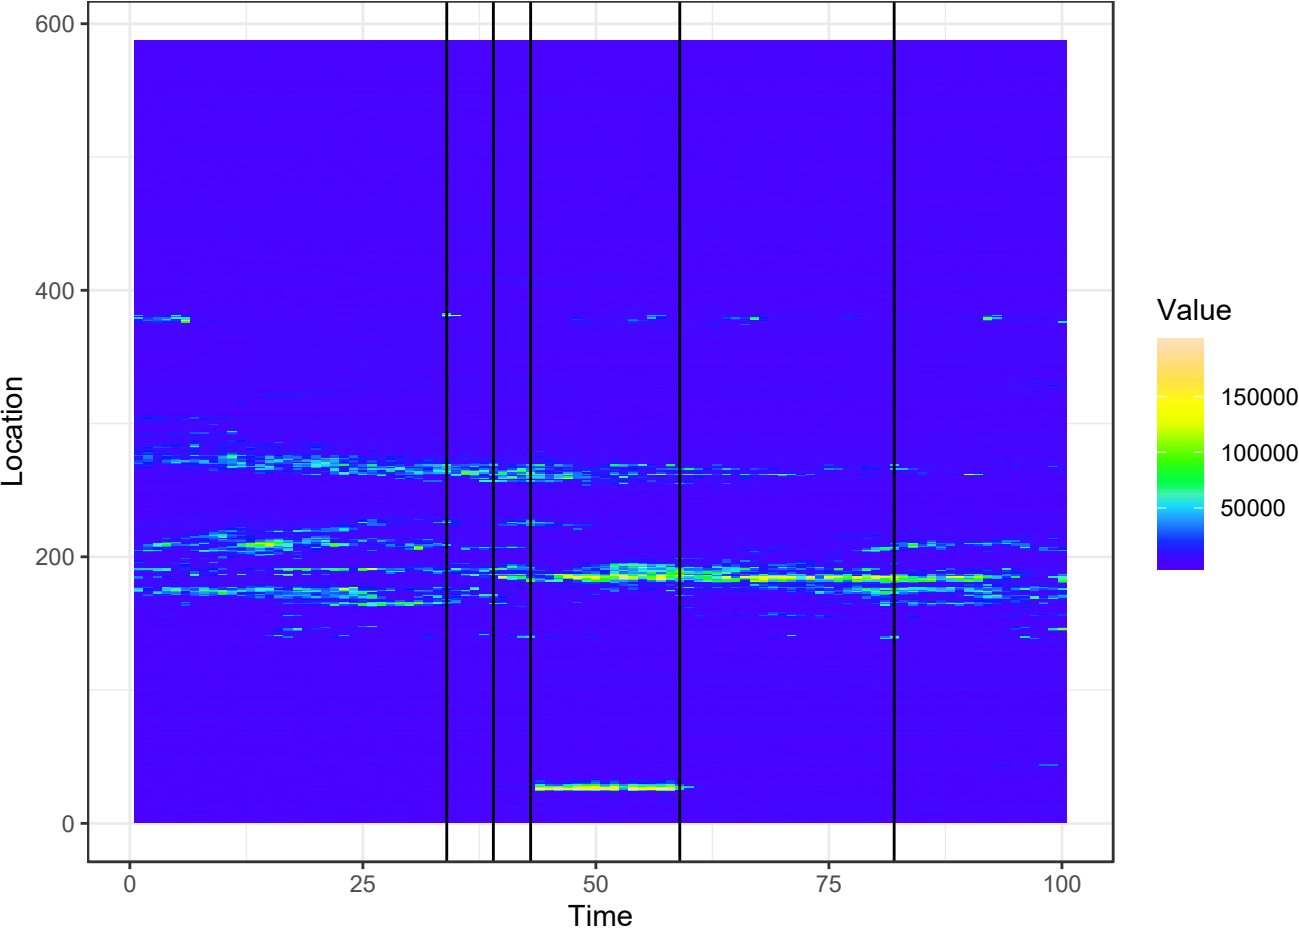

Supplement: S2 (10.1371/journal.pone.0236331.s002) [file journal.pone.0236331.s002]

**Original**

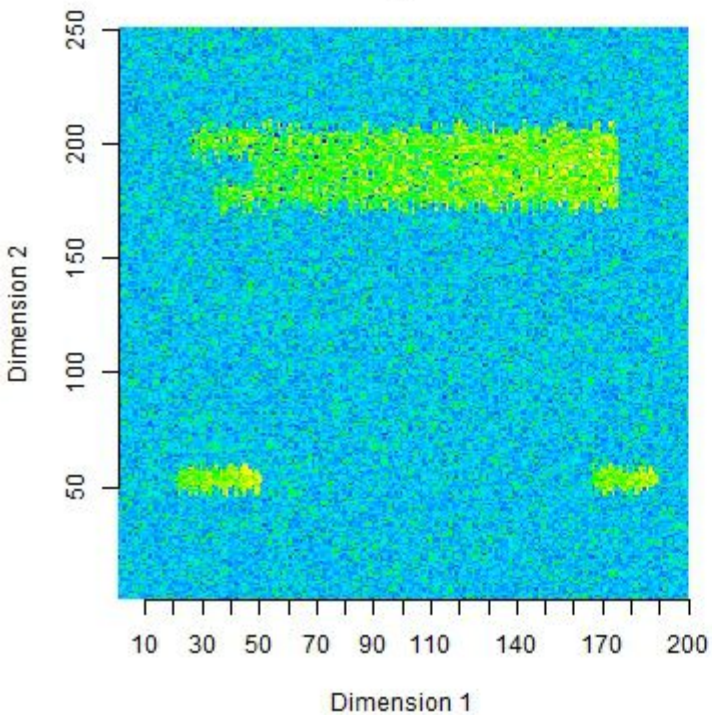

**Events**

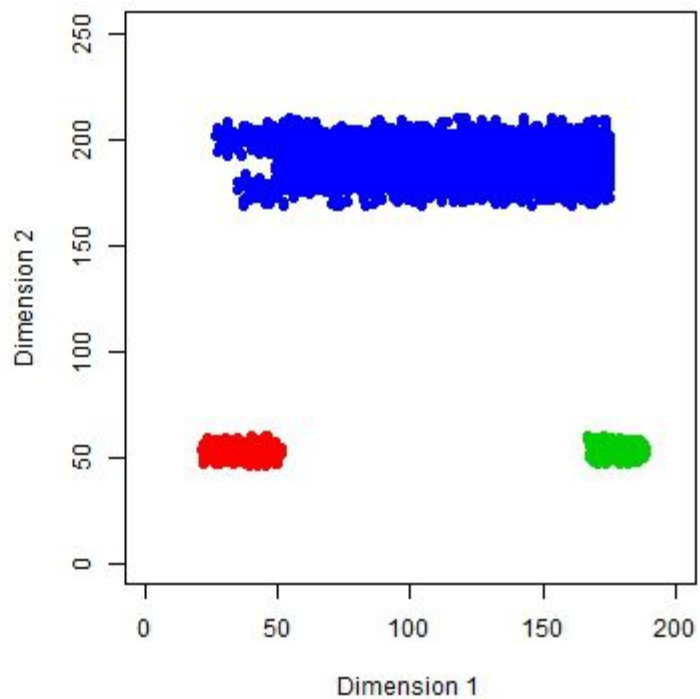

Supplement: S2 (10.1371/journal.pone.0236331.s002) [file journal.pone.0236331.s002]

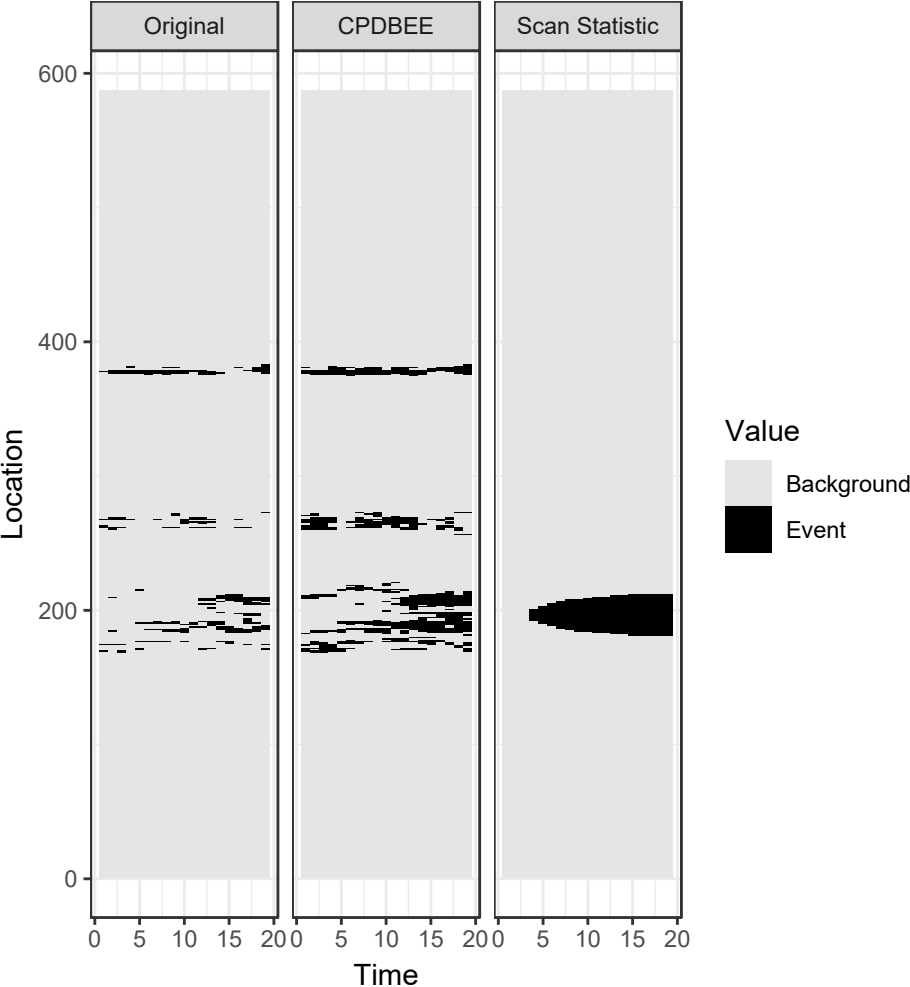

Supplement: S2 (10.1371/journal.pone.0236331.s002) [file journal.pone.0236331.s002]

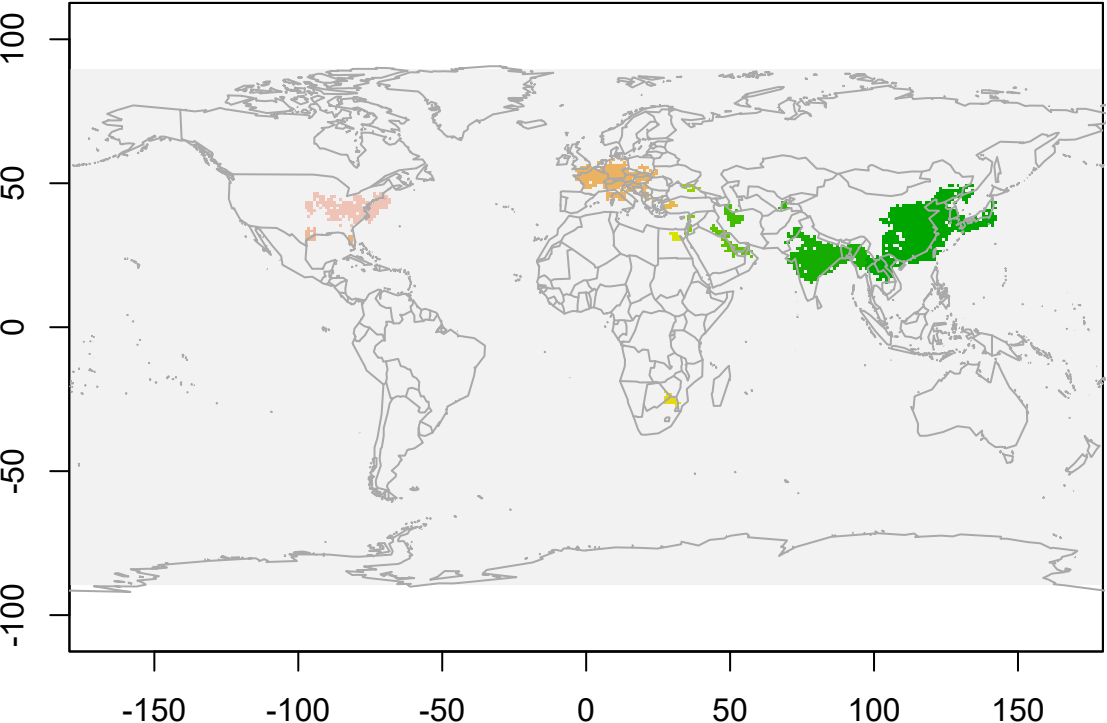

Supplement: S2 (10.1371/journal.pone.0236331.s002) [file journal.pone.0236331.s002]

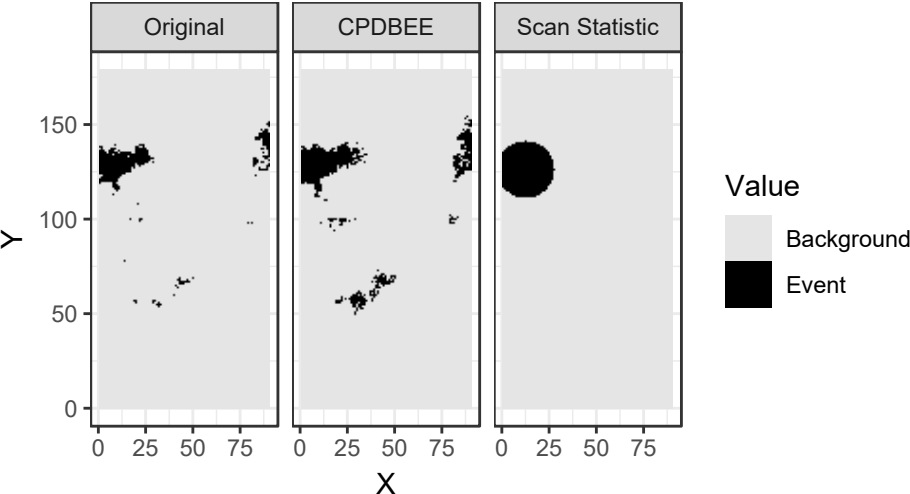

Supplement: S2 (10.1371/journal.pone.0236331.s002) [file journal.pone.0236331.s002]

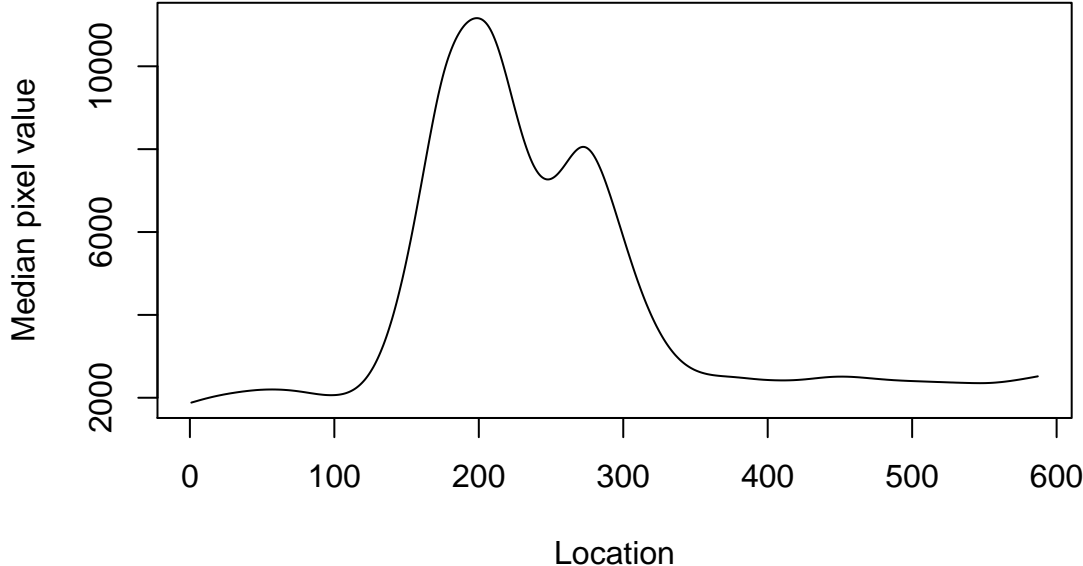

Supplement: S2 (10.1371/journal.pone.0236331.s002) [file journal.pone.0236331.s002]

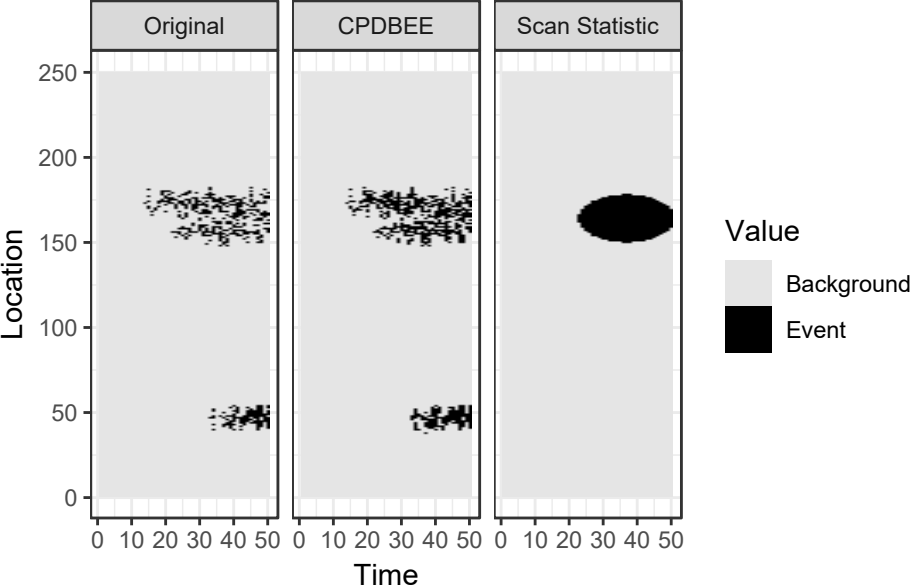

Supplement: S2 (10.1371/journal.pone.0236331.s002) [file journal.pone.0236331.s002]

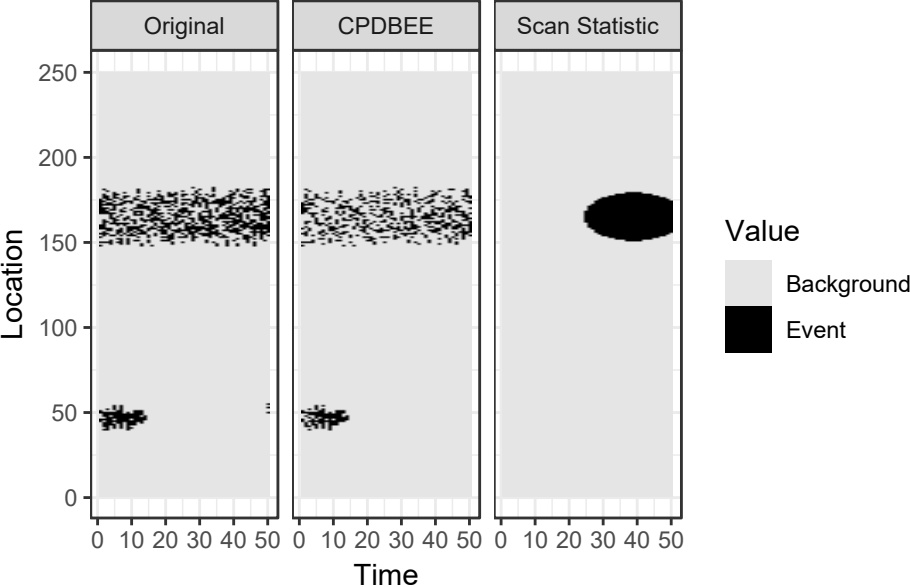

Supplement: S2 (10.1371/journal.pone.0236331.s002) [file journal.pone.0236331.s002]

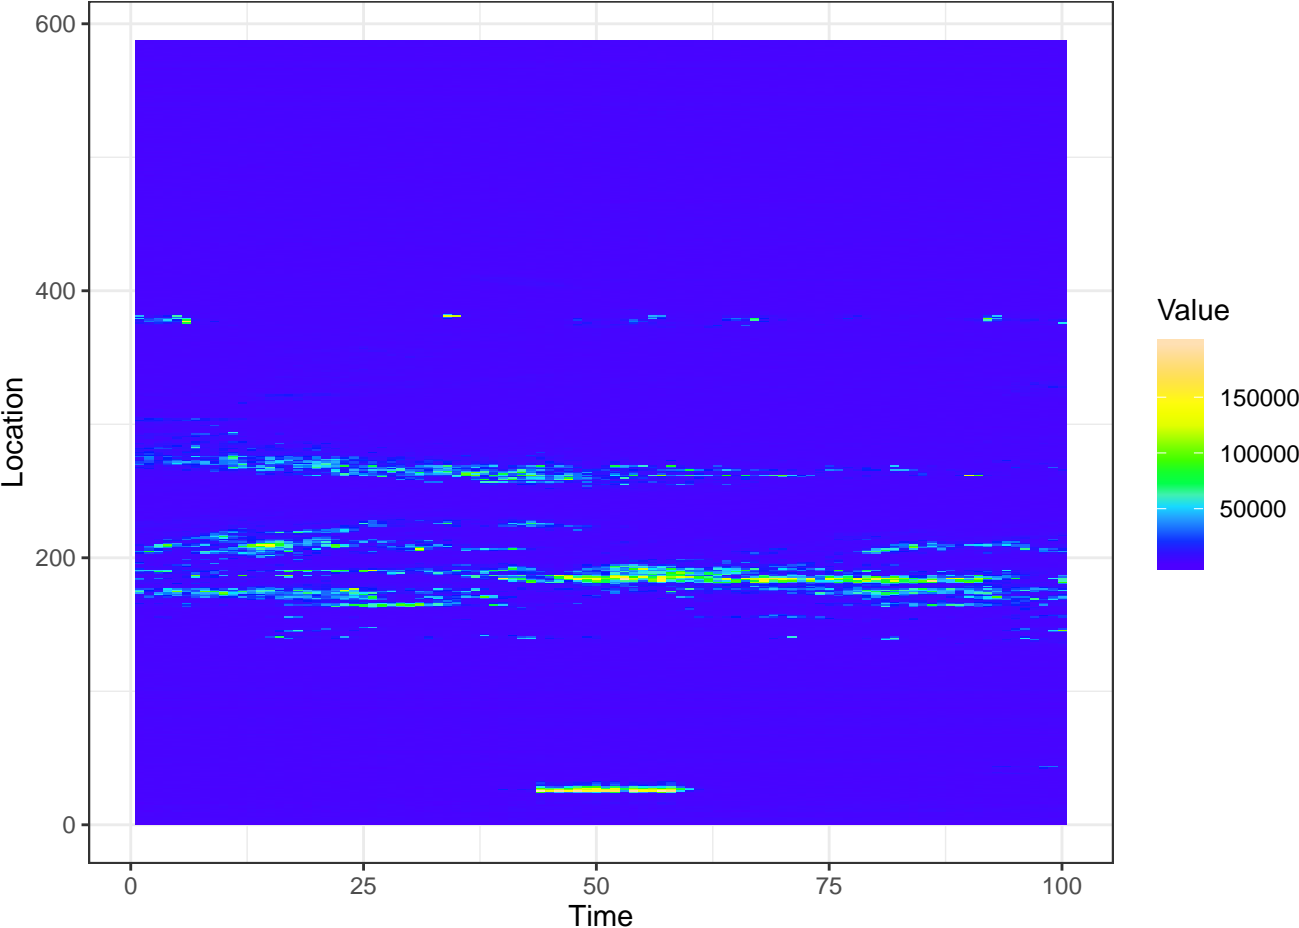

Supplement: S2 (10.1371/journal.pone.0236331.s002) [file journal.pone.0236331.s002]

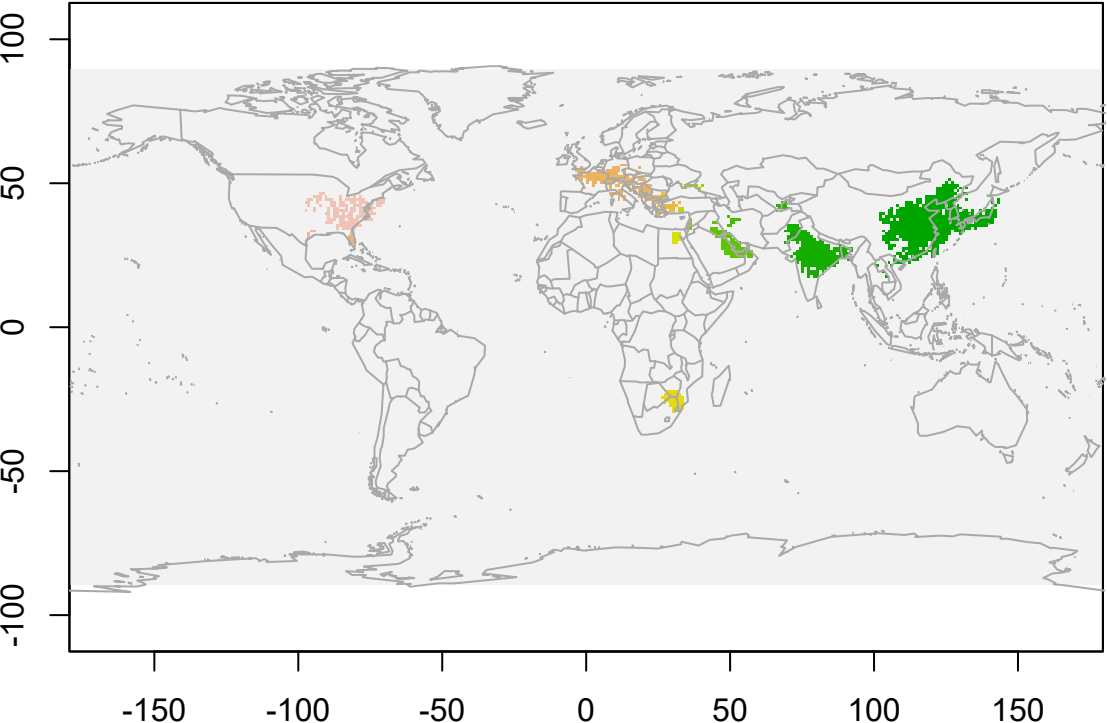

Supplement: S2 (10.1371/journal.pone.0236331.s002) [file journal.pone.0236331.s002]

# Nemenyi test ranks using AUC

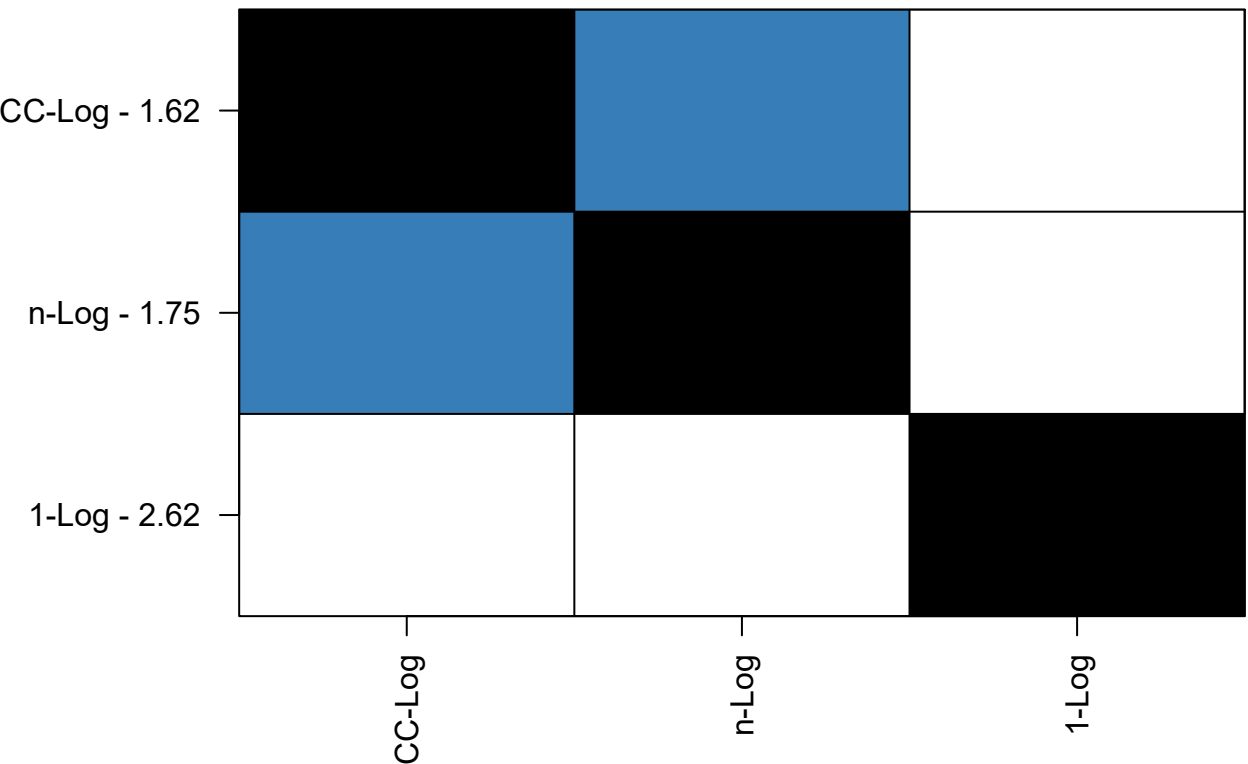

Supplement: S2 (10.1371/journal.pone.0236331.s002) [file journal.pone.0236331.s002]

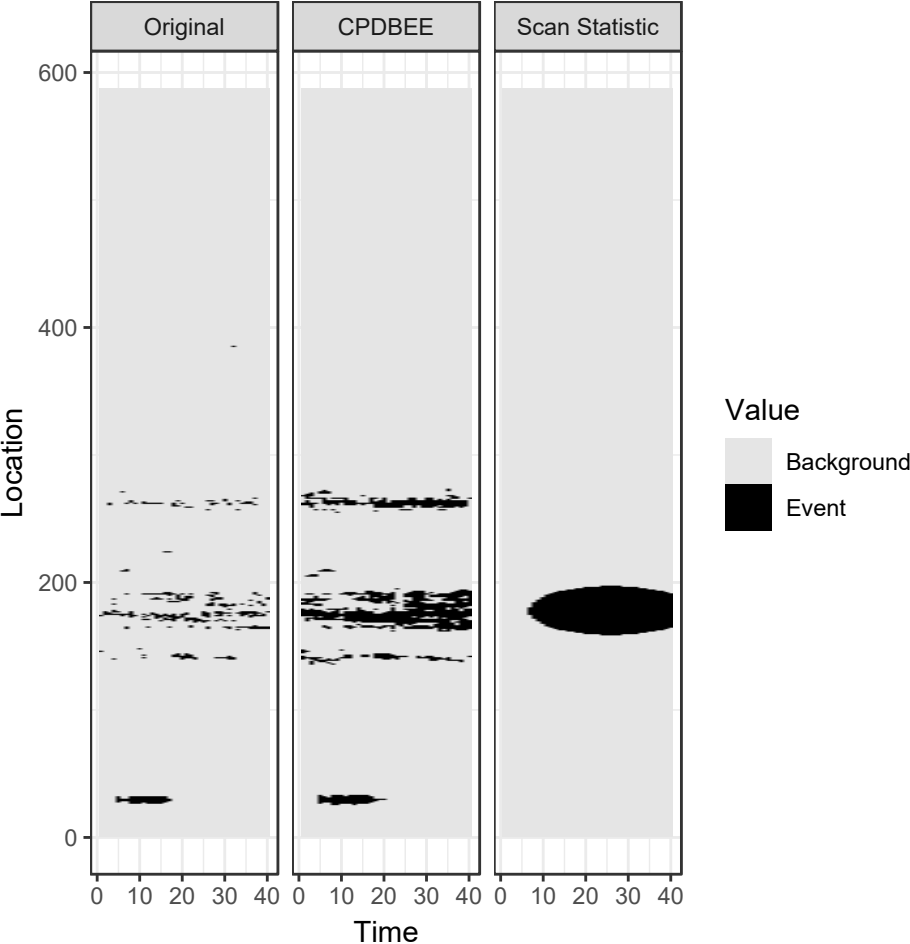

Supplement: S2 (10.1371/journal.pone.0236331.s002) [file journal.pone.0236331.s002]

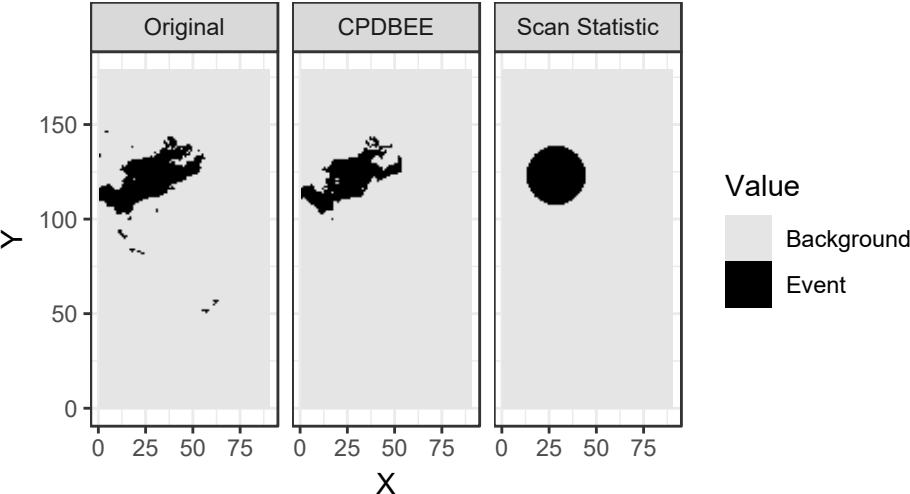

Supplement: S2 (10.1371/journal.pone.0236331.s002) [file journal.pone.0236331.s002]

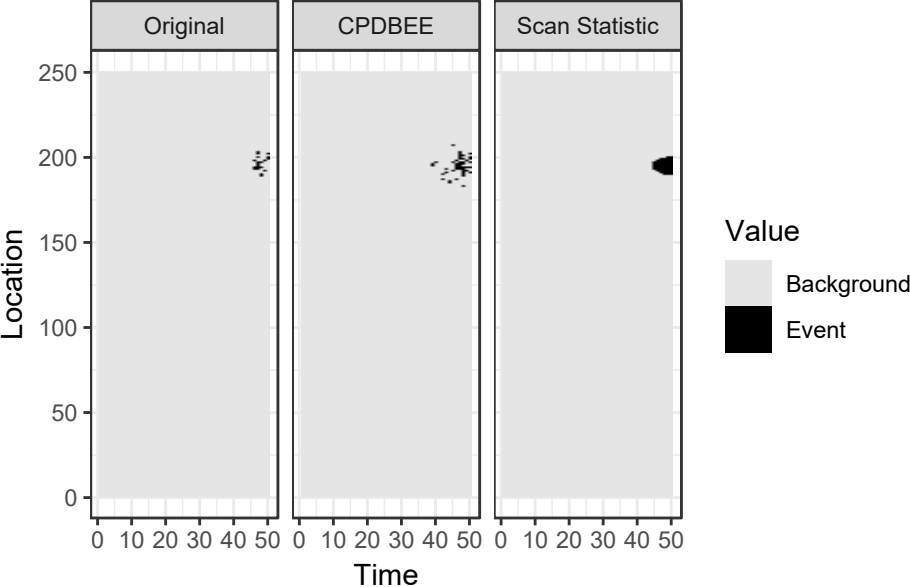

Supplement: S2 (10.1371/journal.pone.0236331.s002) [file journal.pone.0236331.s002]

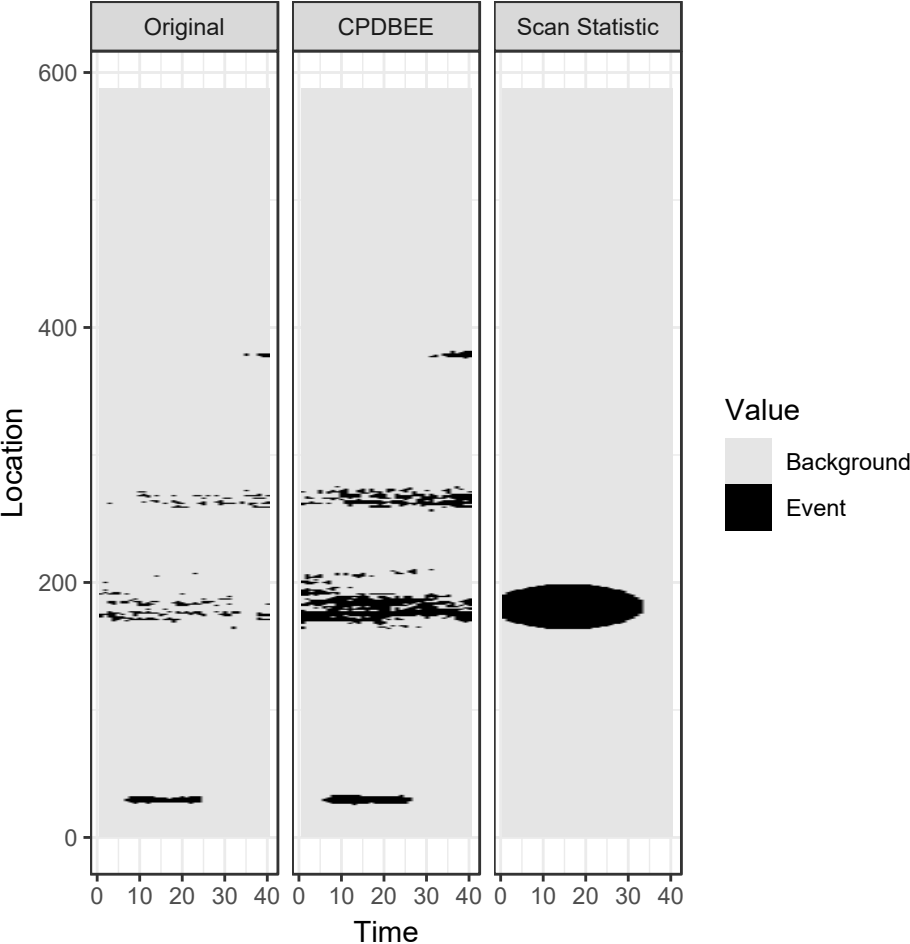

Supplement: S2 (10.1371/journal.pone.0236331.s002) [file journal.pone.0236331.s002]

# Nemenyi test ranks for NO<sub>2</sub> data

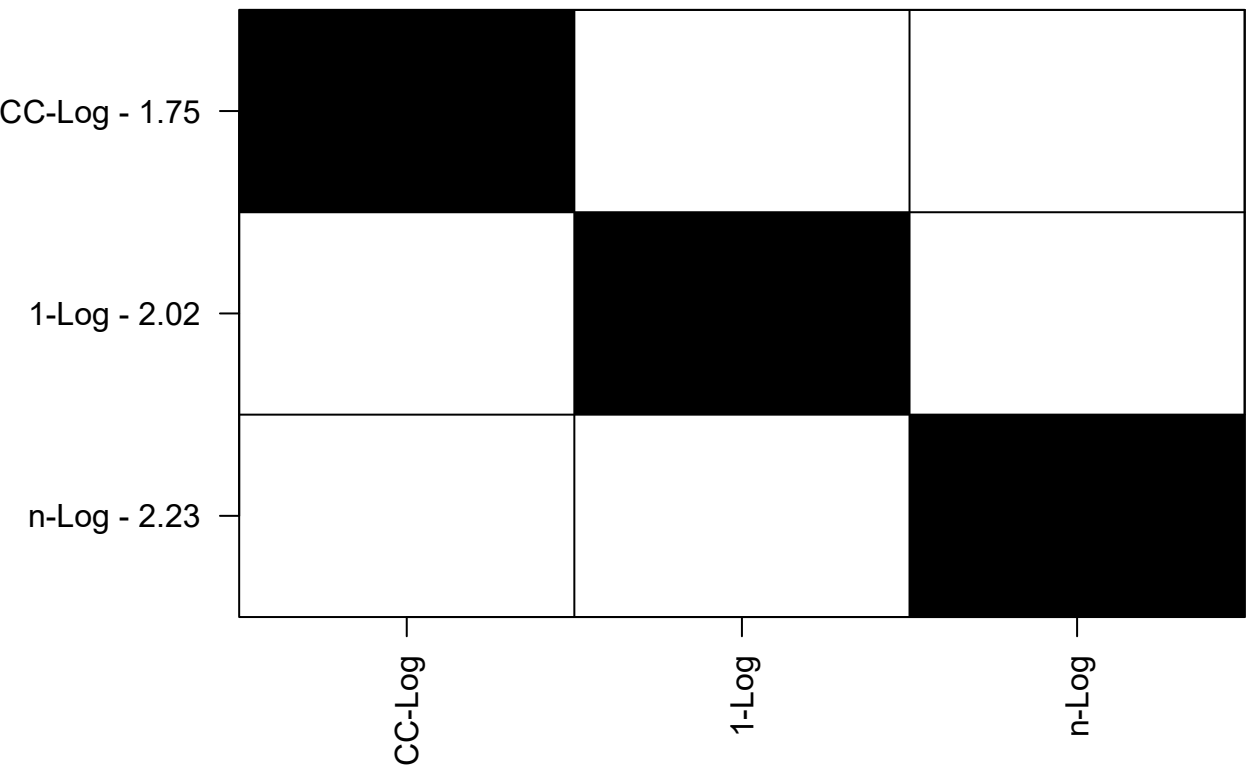

Supplement: S2 (10.1371/journal.pone.0236331.s002) [file journal.pone.0236331.s002]

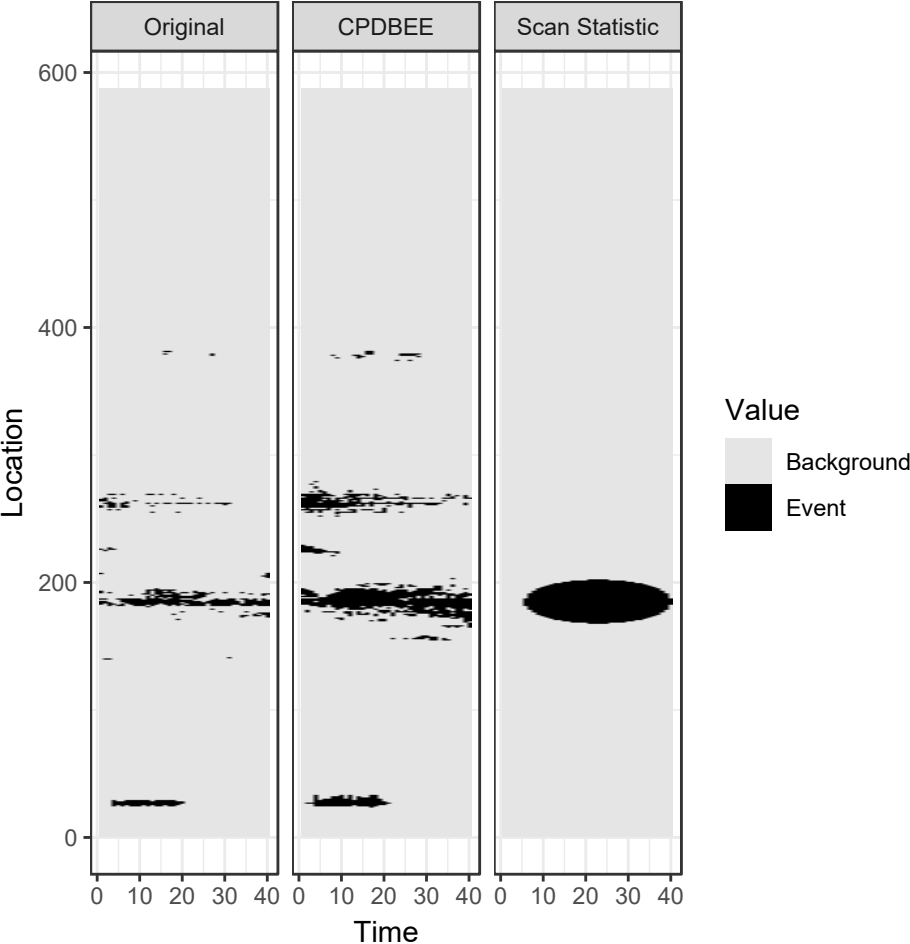

Supplement: S2 (10.1371/journal.pone.0236331.s002) [file journal.pone.0236331.s002]

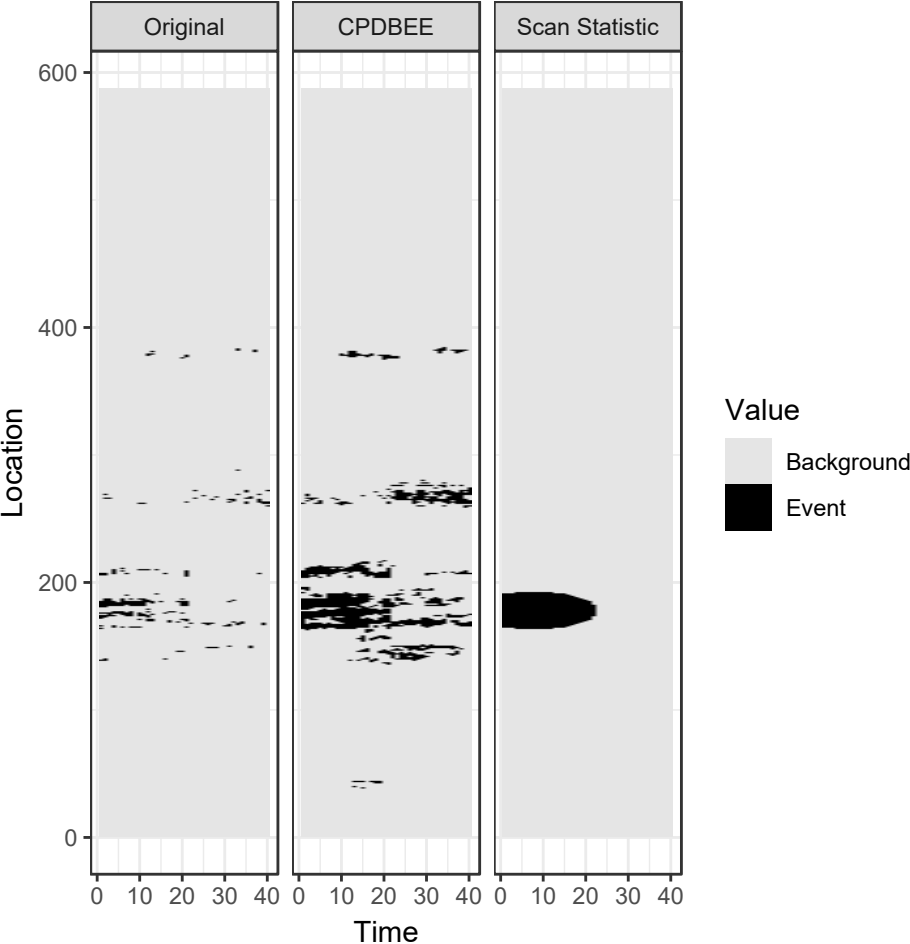

Supplement: S2 (10.1371/journal.pone.0236331.s002) [file journal.pone.0236331.s002]

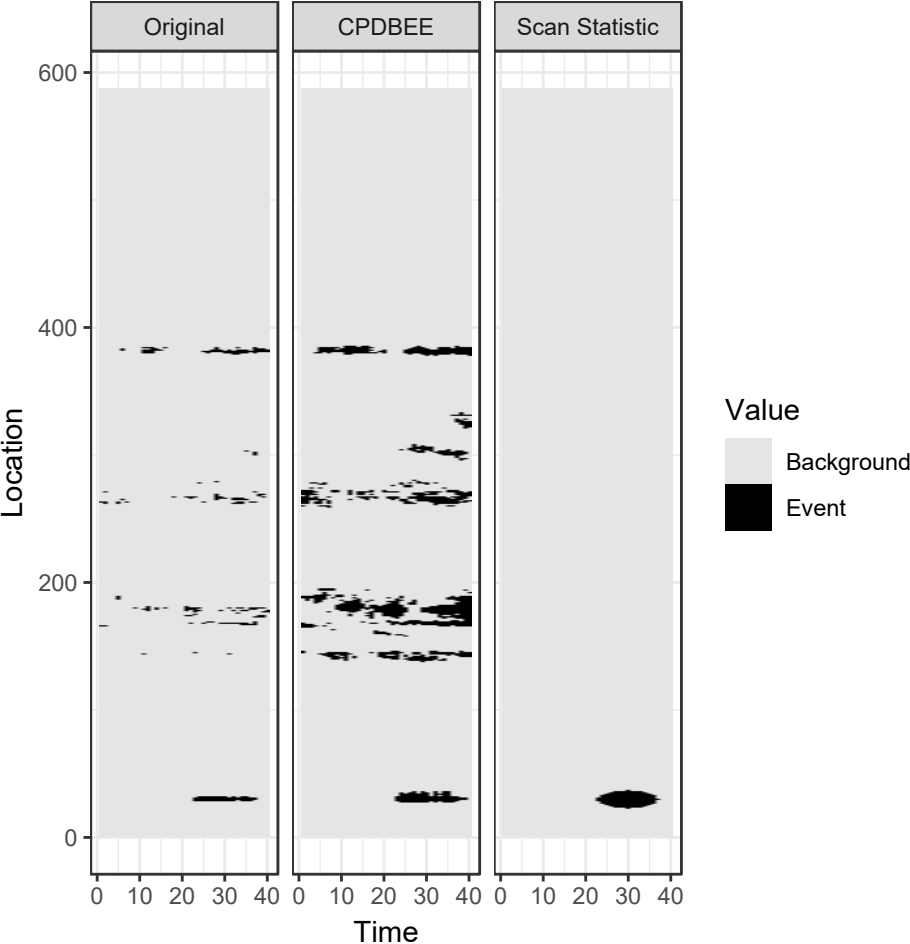

Supplement: S2 (10.1371/journal.pone.0236331.s002) [file journal.pone.0236331.s002]

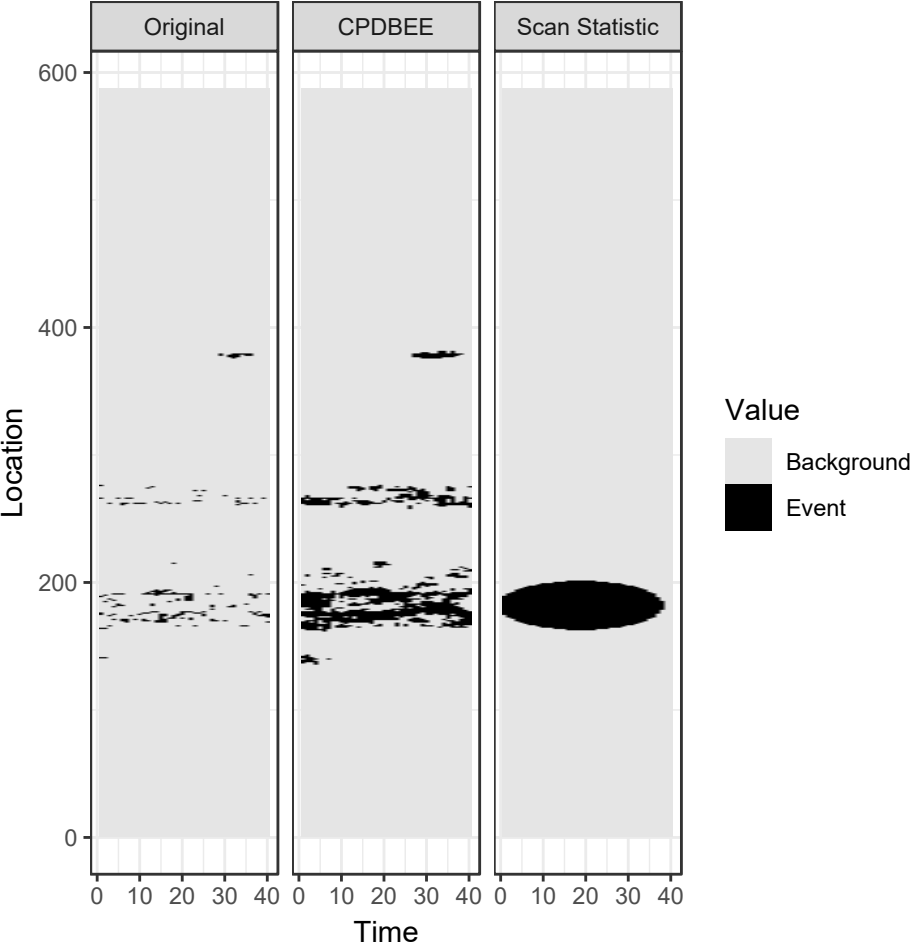

Supplement: S2 (10.1371/journal.pone.0236331.s002) [file journal.pone.0236331.s002]

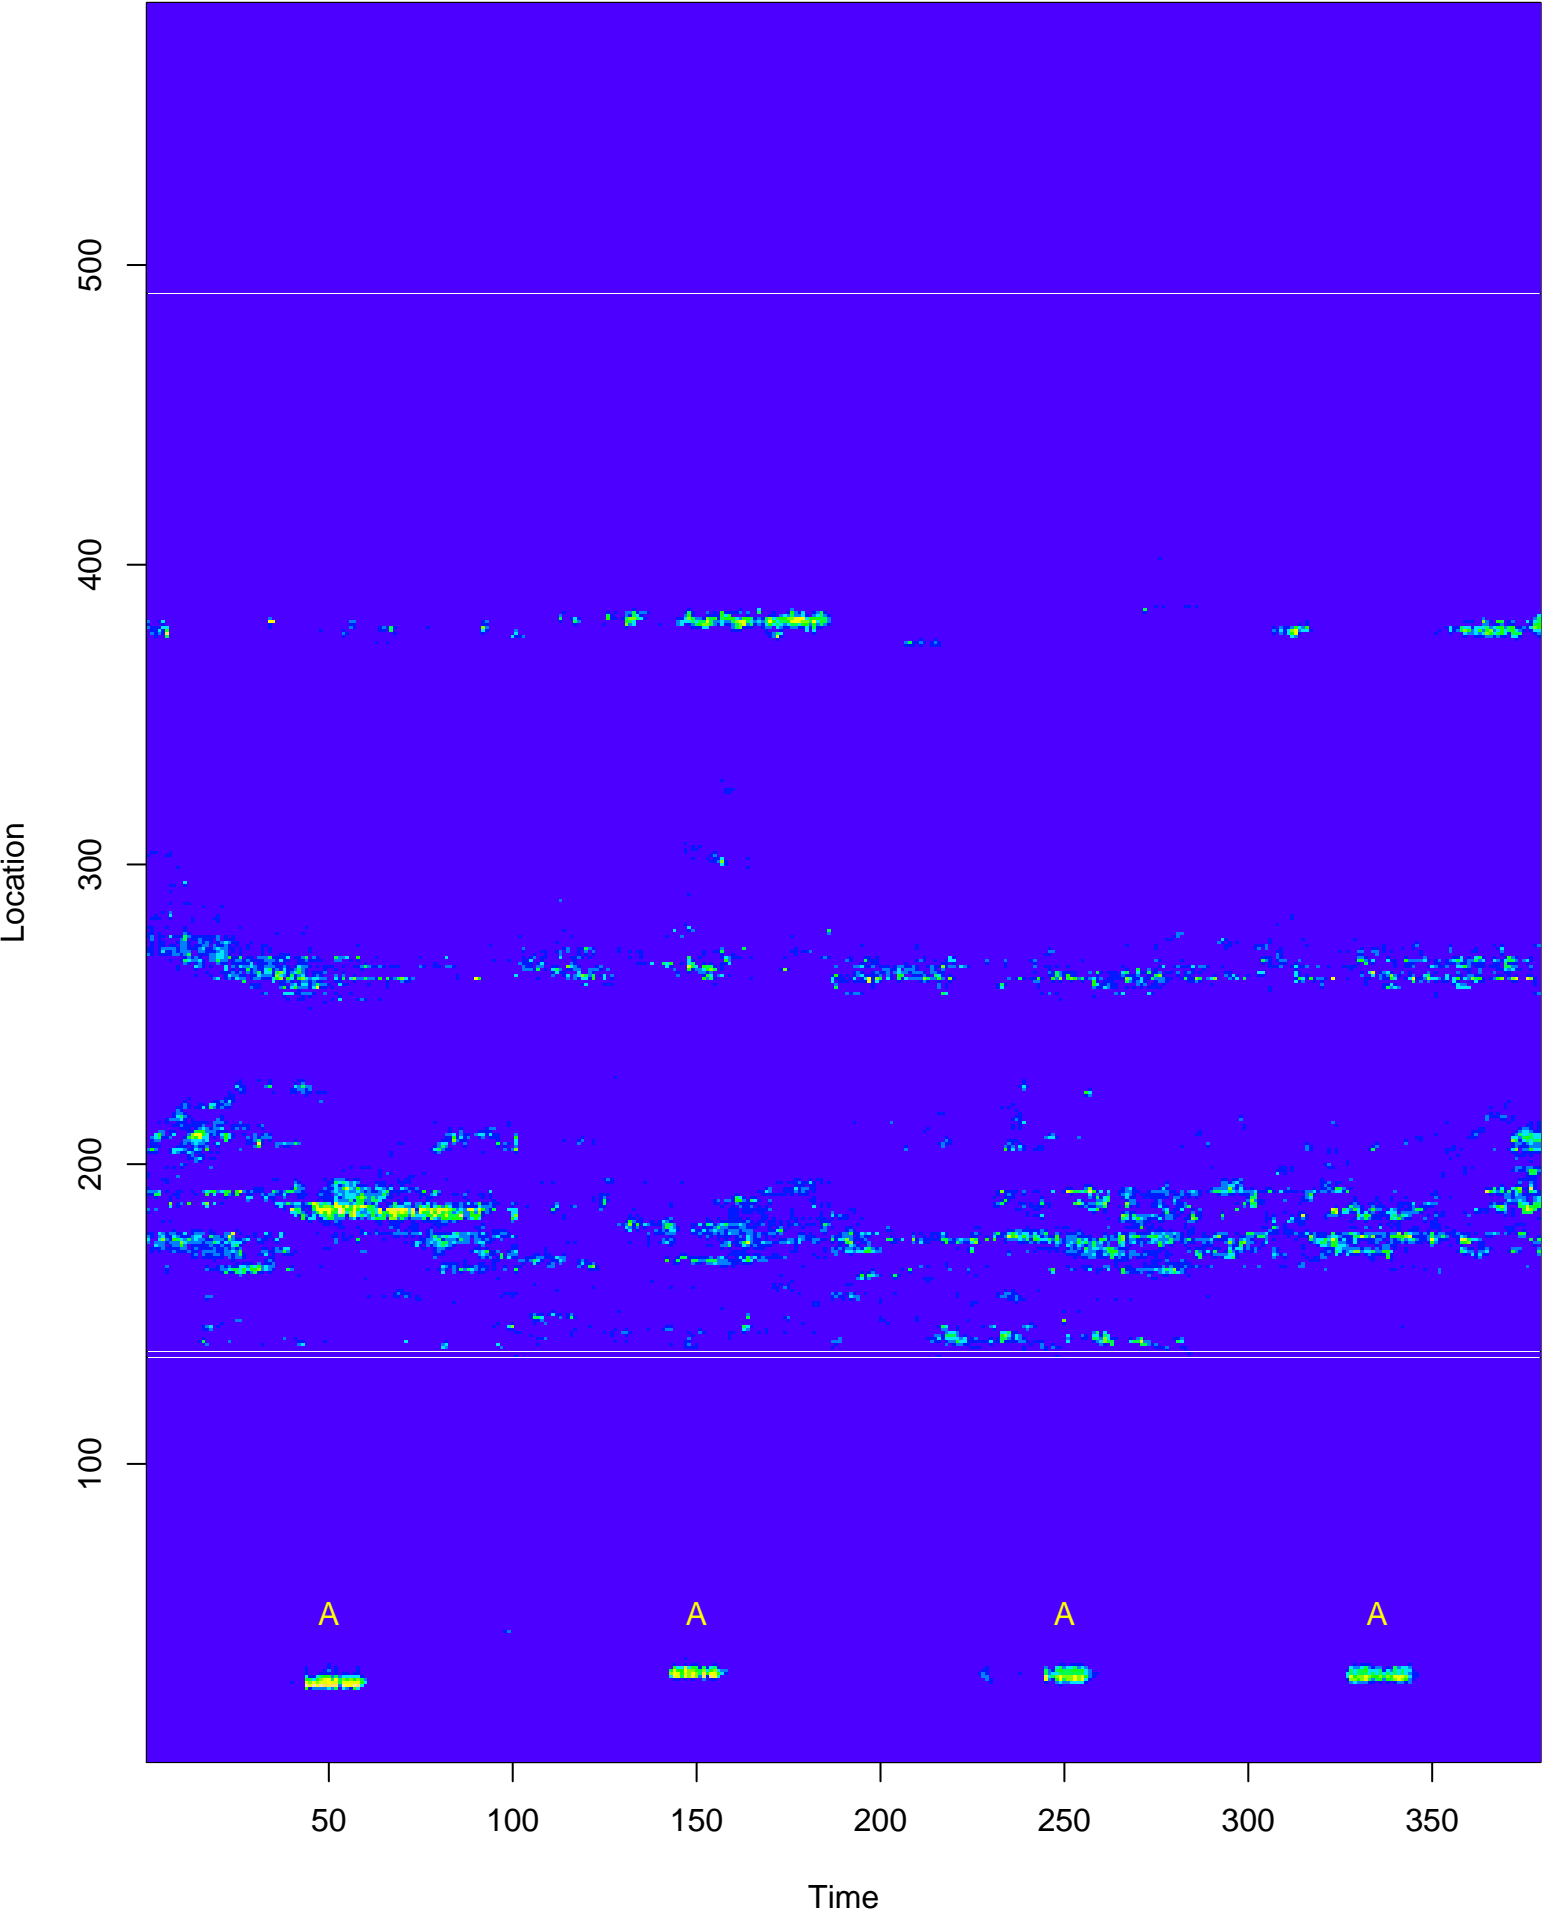

Supplement: S2 (10.1371/journal.pone.0236331.s002) [file journal.pone.0236331.s002]

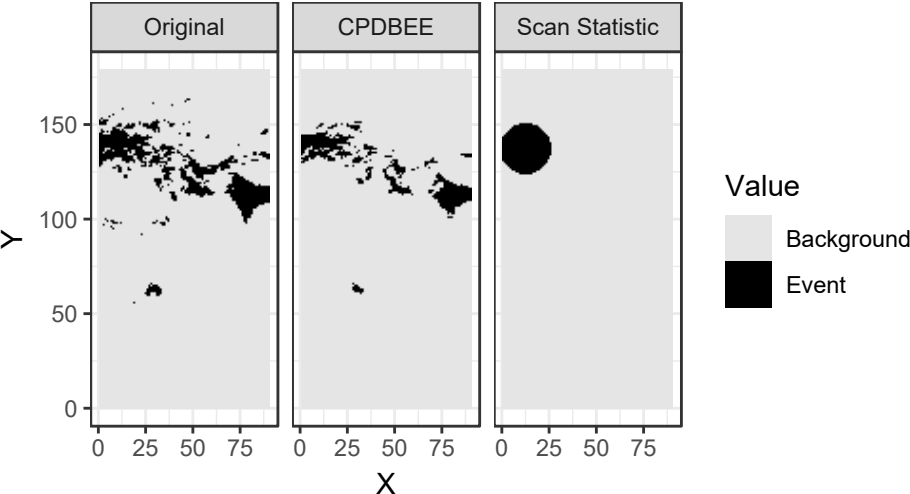

Supplement: S2 (10.1371/journal.pone.0236331.s002) [file journal.pone.0236331.s002]

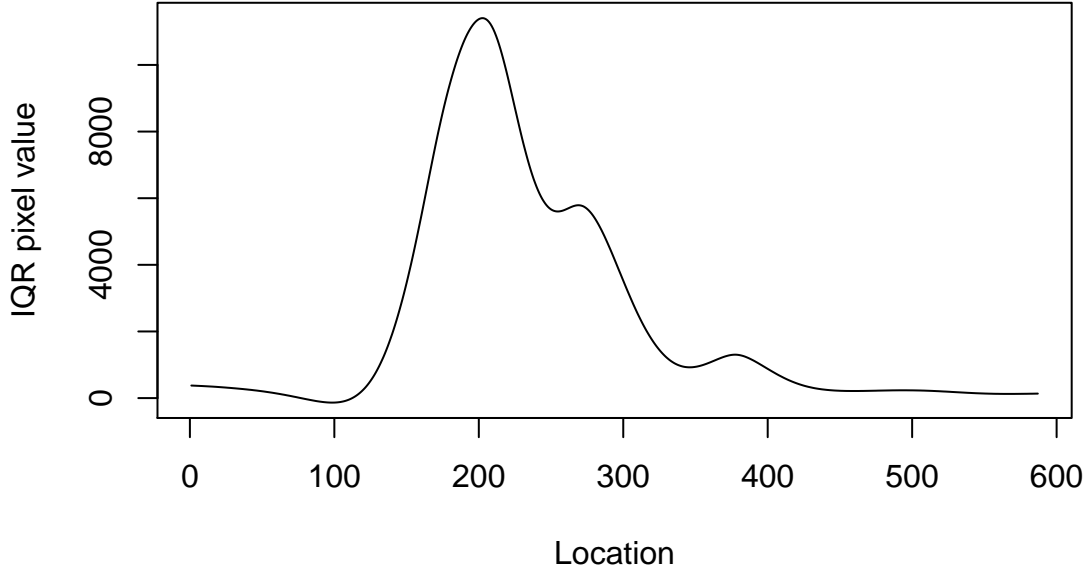

Supplement: S2 (10.1371/journal.pone.0236331.s002) [file journal.pone.0236331.s002]

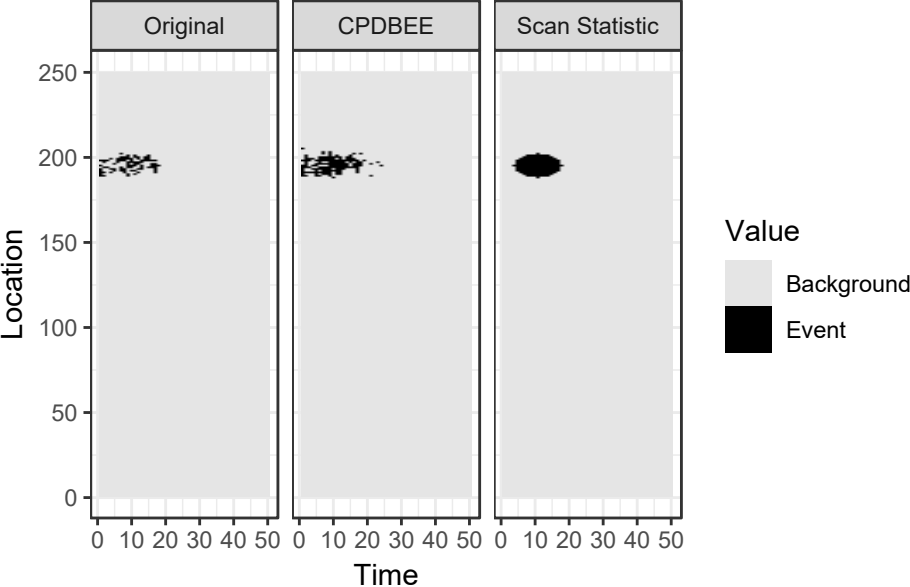

Supplement: S2 (10.1371/journal.pone.0236331.s002) [file journal.pone.0236331.s002]

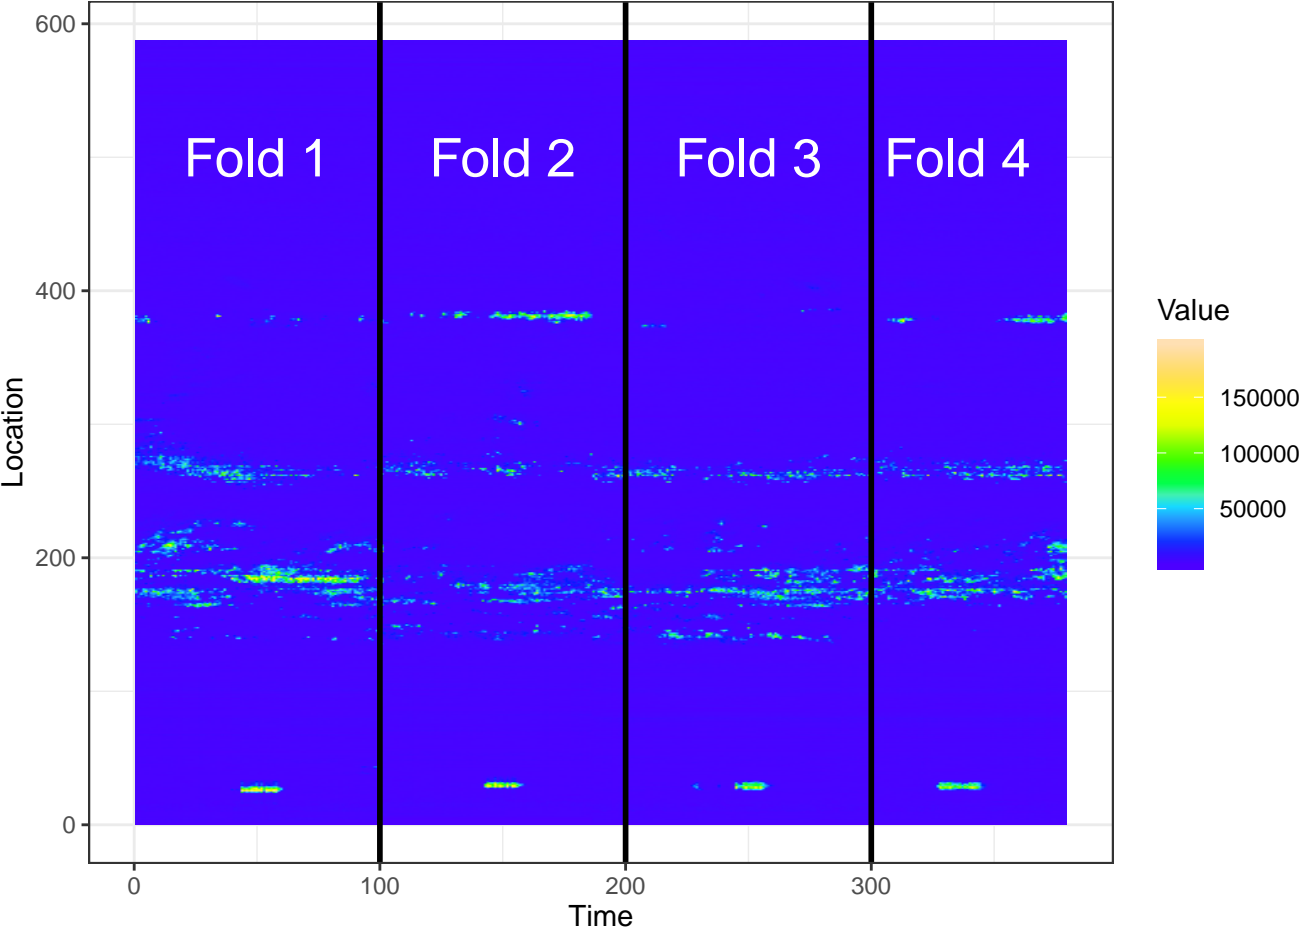

Supplement: S2 (10.1371/journal.pone.0236331.s002) [file journal.pone.0236331.s002]

# Nemenyi test ranks for synthetic data

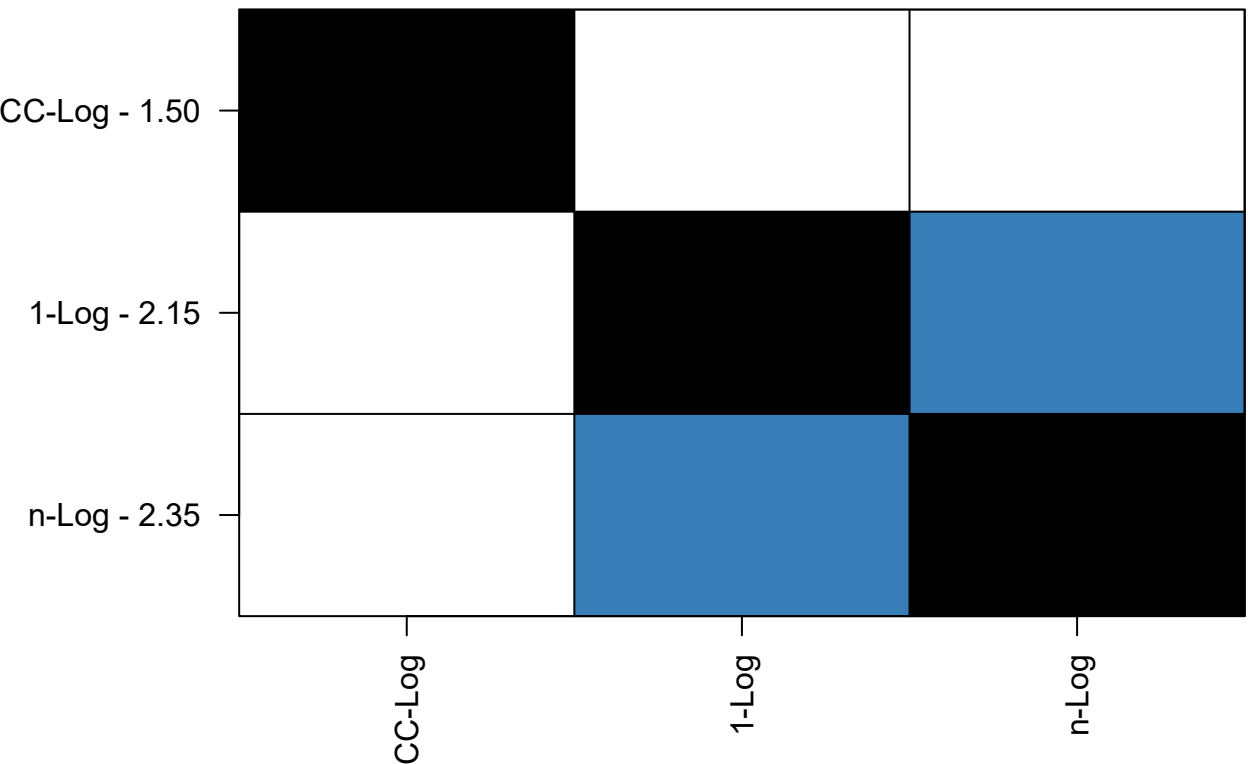

Supplement: S2 (10.1371/journal.pone.0236331.s002) [file journal.pone.0236331.s002]

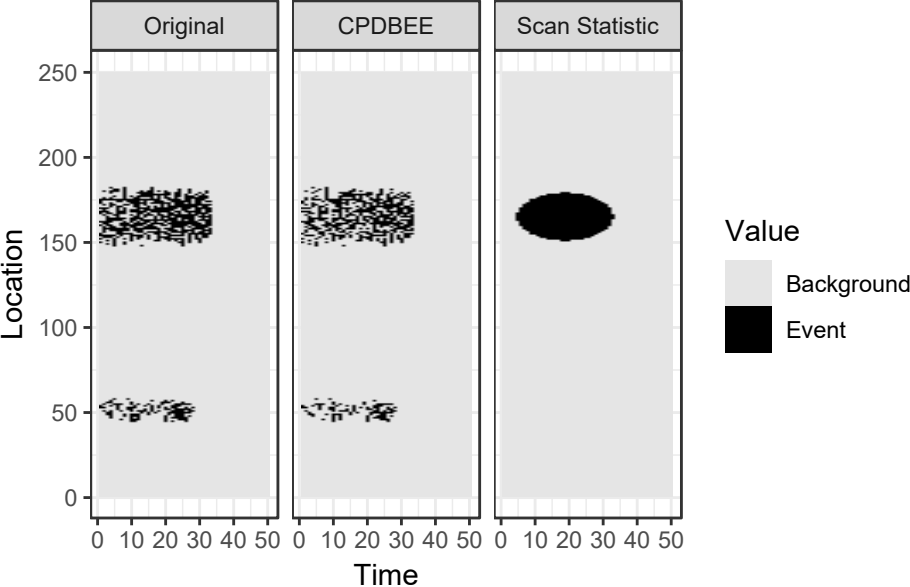

Supplement: S2 (10.1371/journal.pone.0236331.s002) [file journal.pone.0236331.s002]

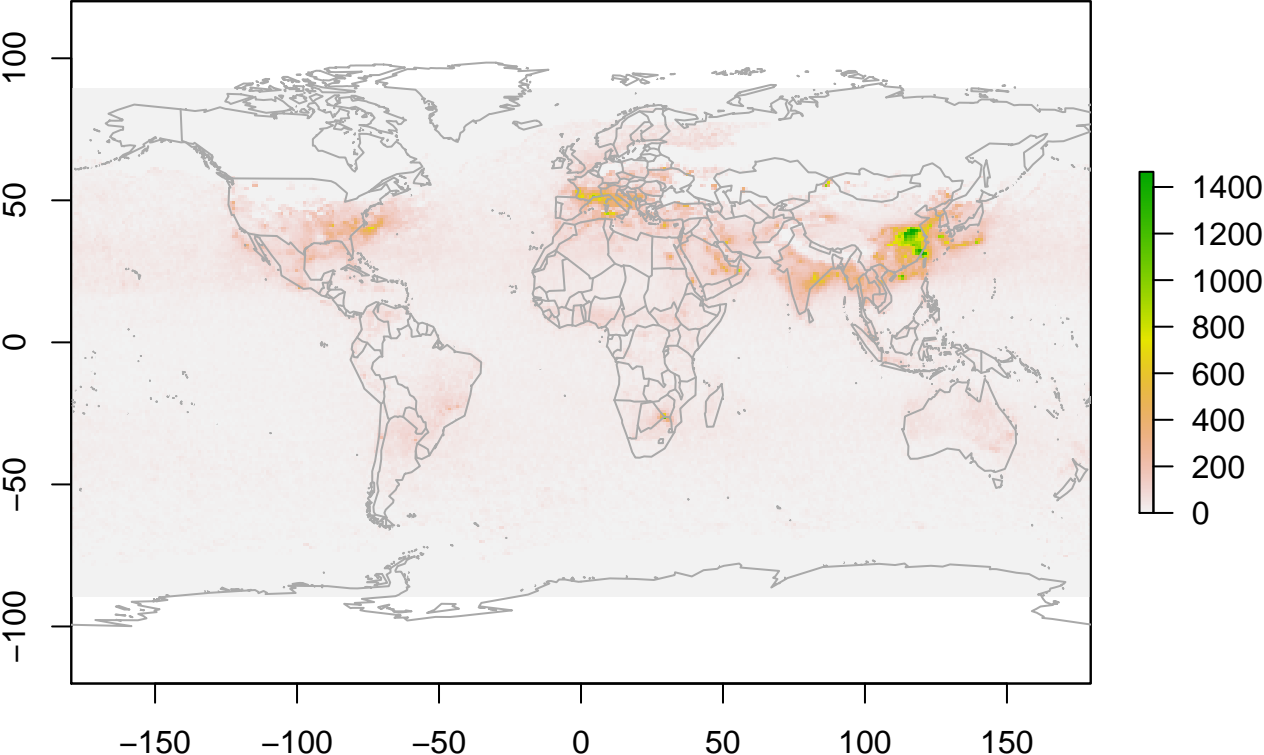

Supplement: S2 (10.1371/journal.pone.0236331.s002) [file journal.pone.0236331.s002]

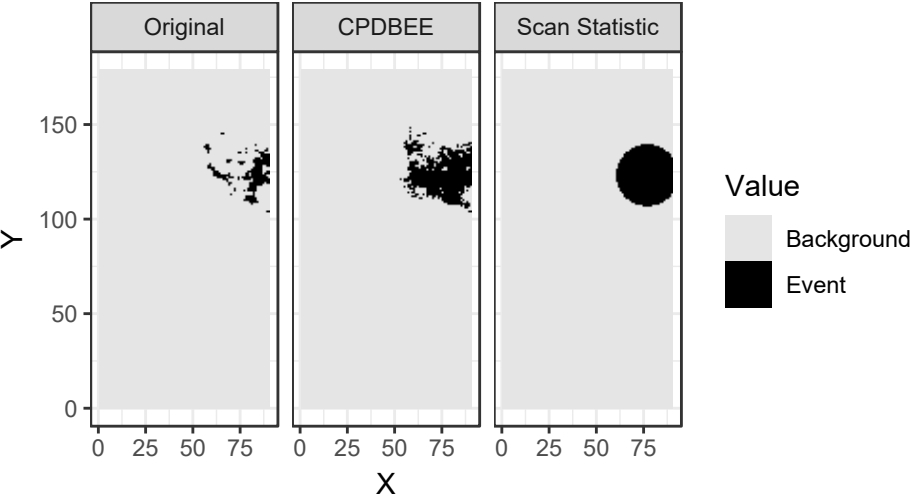

Supplement: S2 (10.1371/journal.pone.0236331.s002) [file journal.pone.0236331.s002]

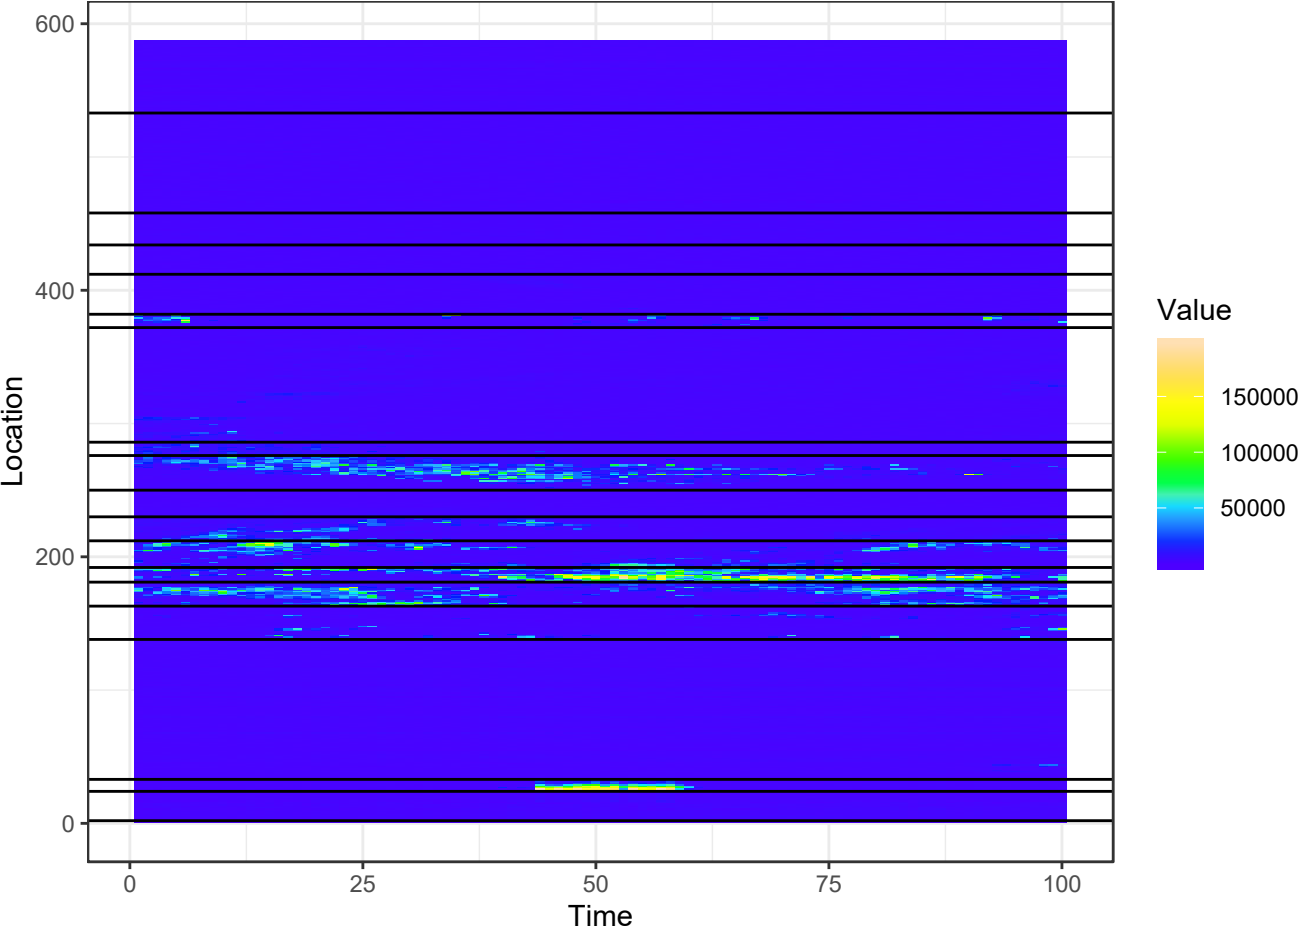

Supplement: S2 (10.1371/journal.pone.0236331.s002) [file journal.pone.0236331.s002]

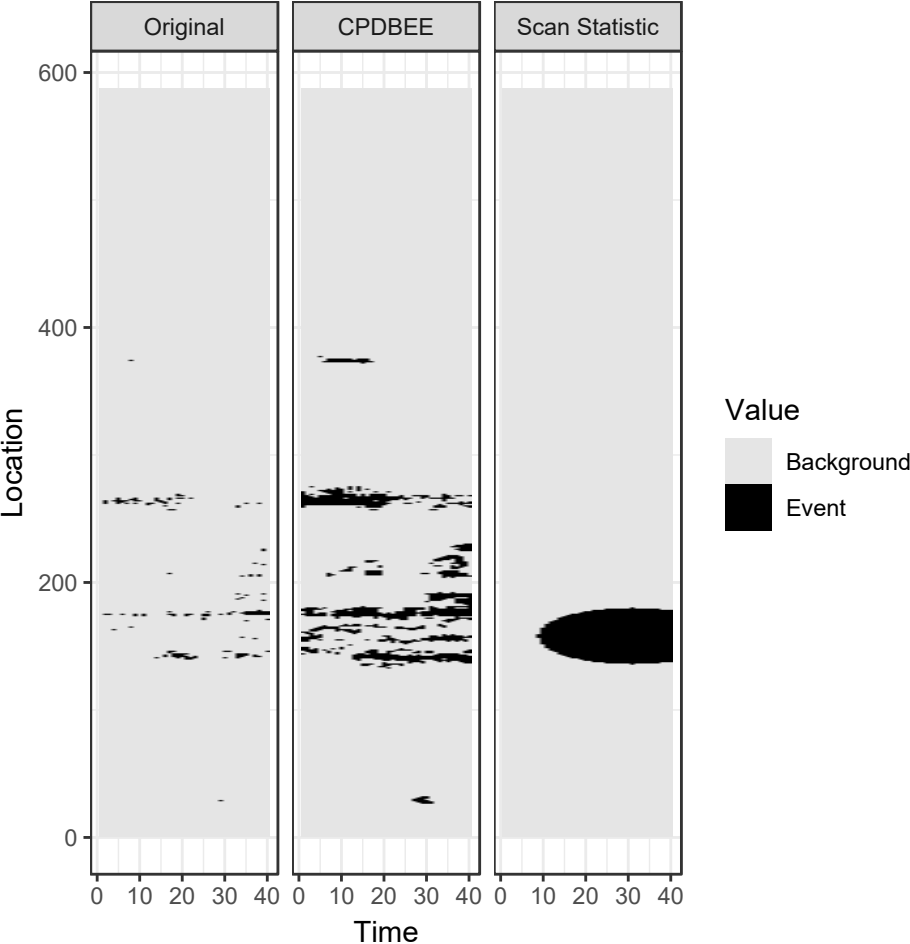

Supplement: S2 (10.1371/journal.pone.0236331.s002) [file journal.pone.0236331.s002]

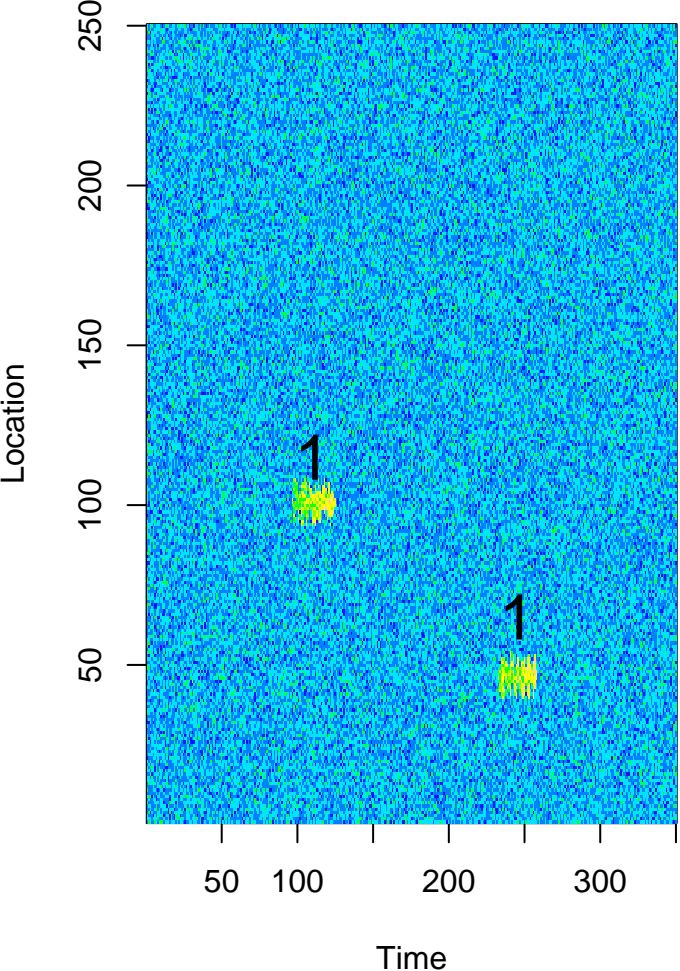

Supplement: S2 (10.1371/journal.pone.0236331.s002) [file journal.pone.0236331.s002]

Location

250

200

150

100

50

50 100

200

300

Time

1

2

3

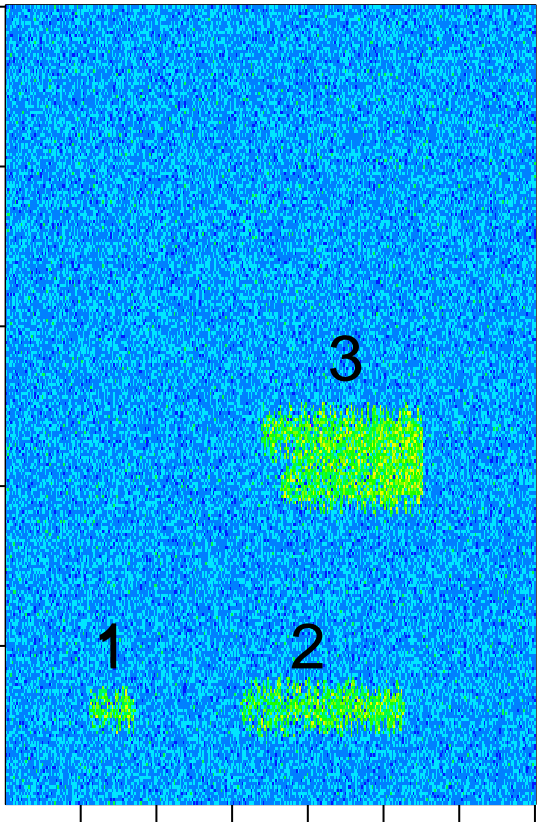

Supplement: S2 (10.1371/journal.pone.0236331.s002) [file journal.pone.0236331.s002]

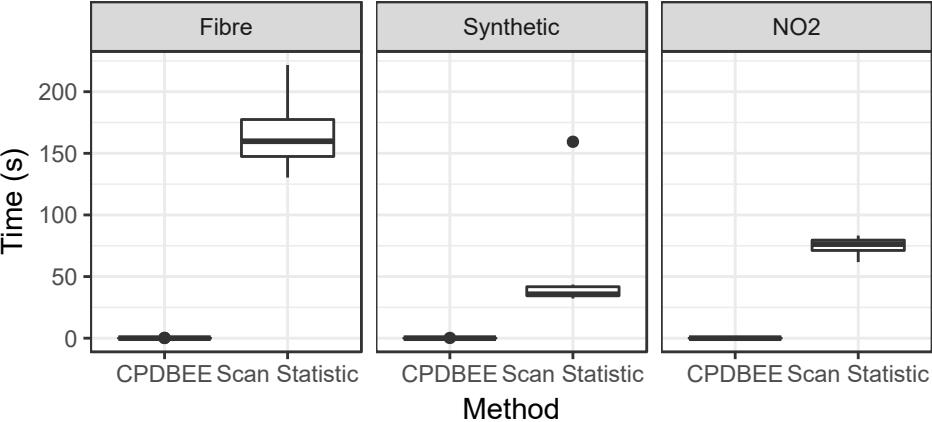

Supplement: S2 (10.1371/journal.pone.0236331.s002) [file journal.pone.0236331.s002]

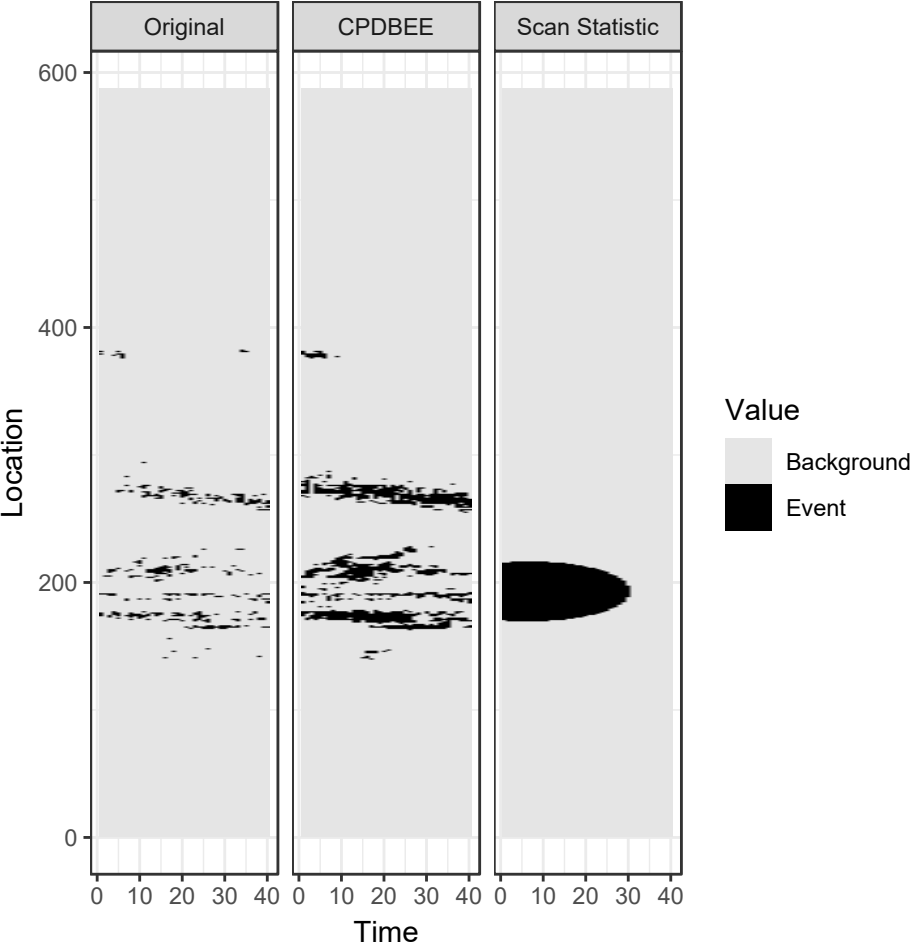

Supplement: S2 (10.1371/journal.pone.0236331.s002) [file journal.pone.0236331.s002]

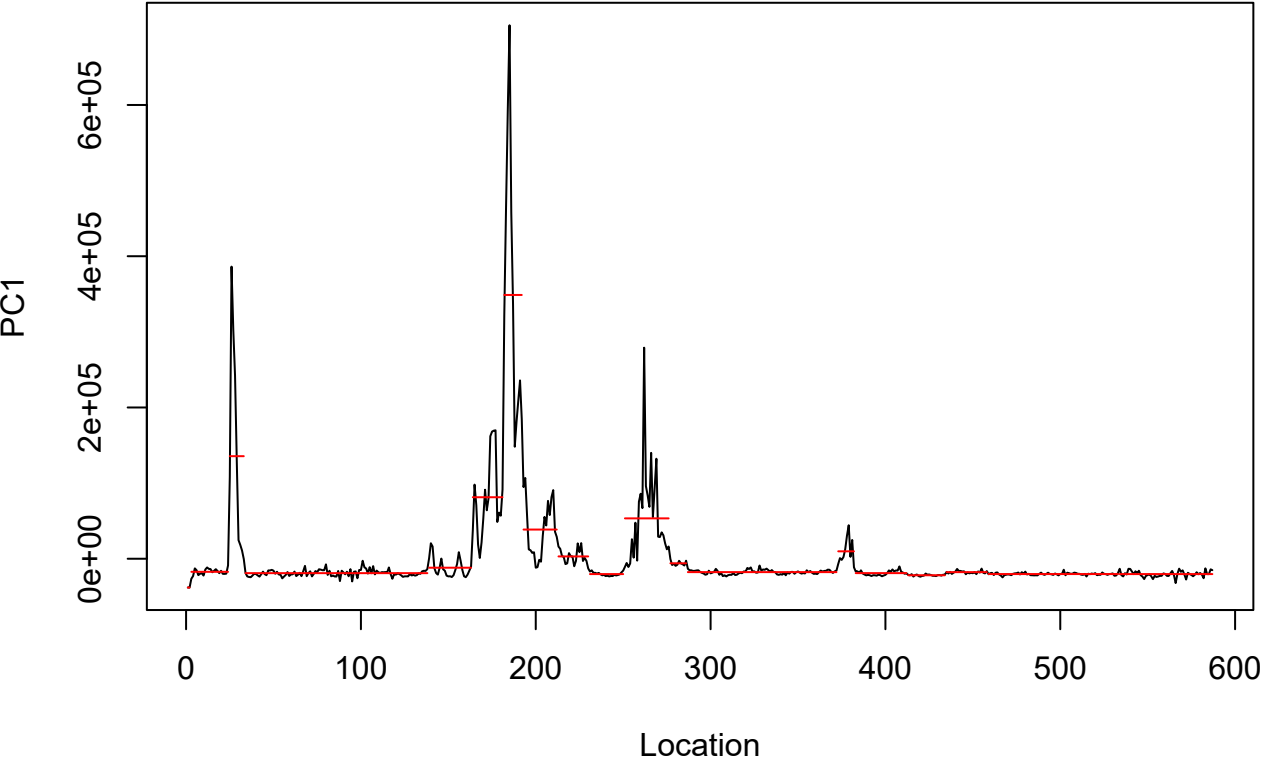

Supplement: S2 (10.1371/journal.pone.0236331.s002) [file journal.pone.0236331.s002]

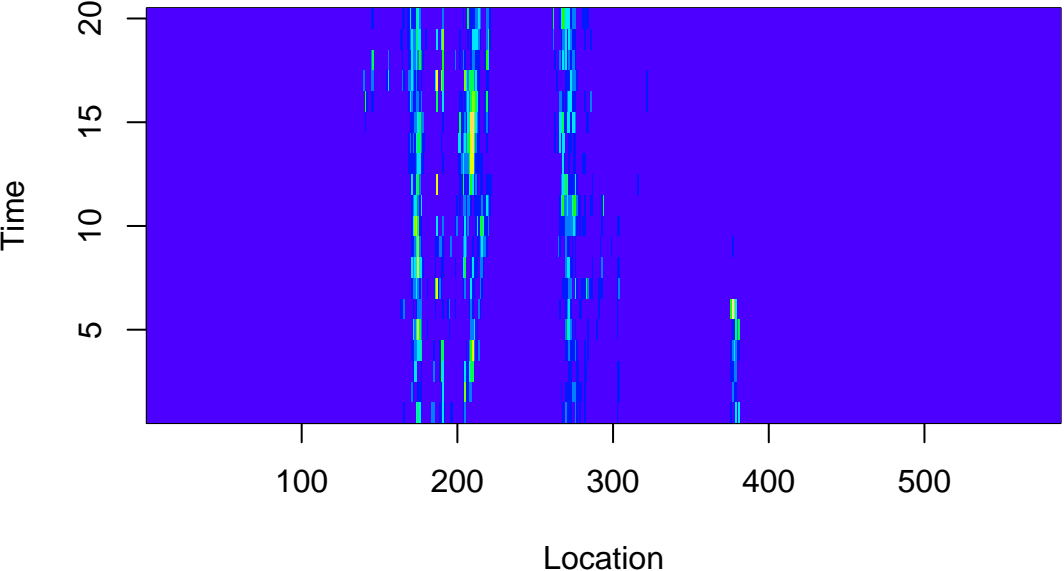

Supplement: S2 (10.1371/journal.pone.0236331.s002) [file journal.pone.0236331.s002]

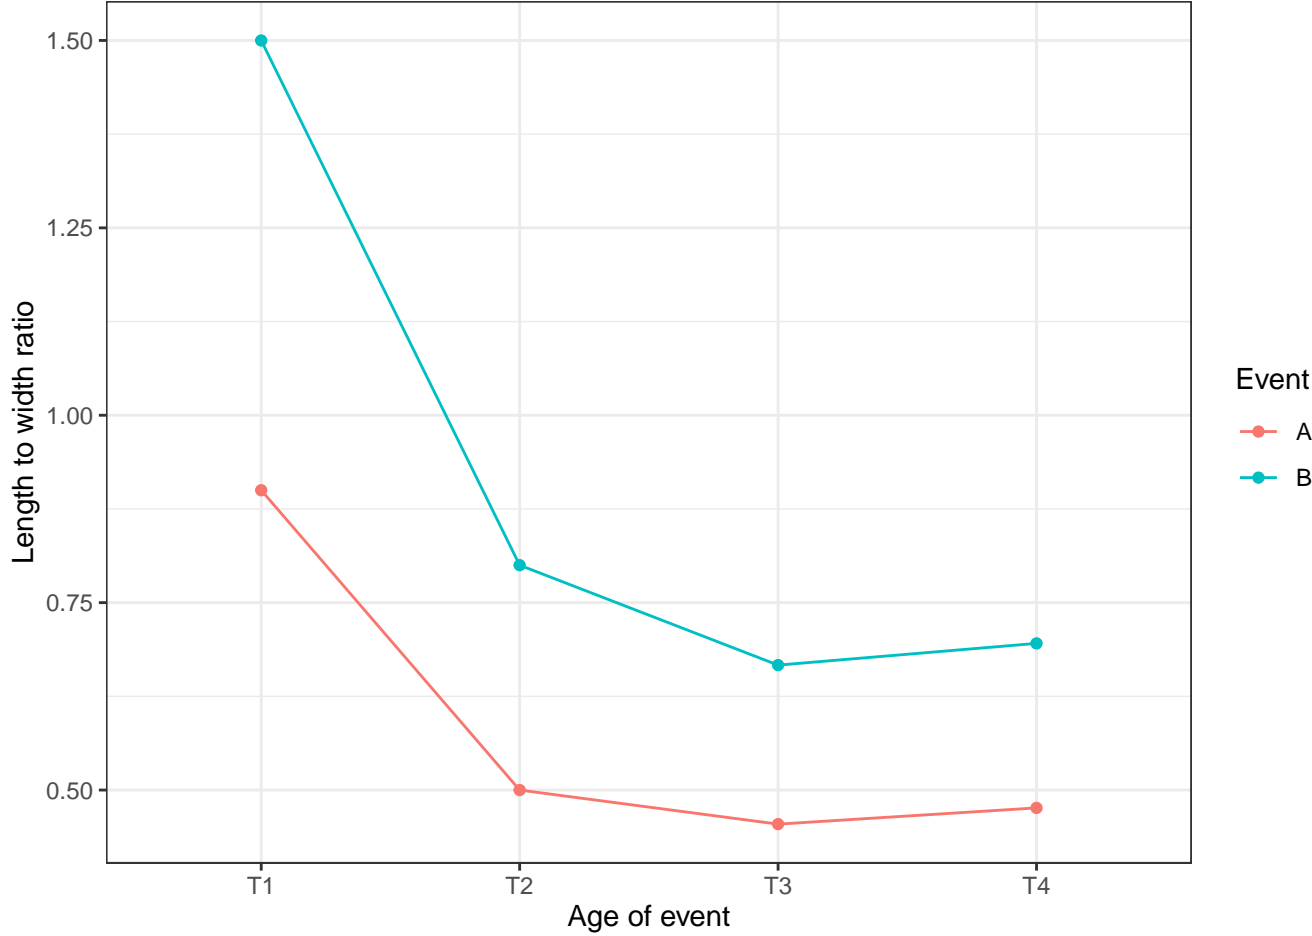

Supplement: S2 (10.1371/journal.pone.0236331.s002) [file journal.pone.0236331.s002]

**Original**

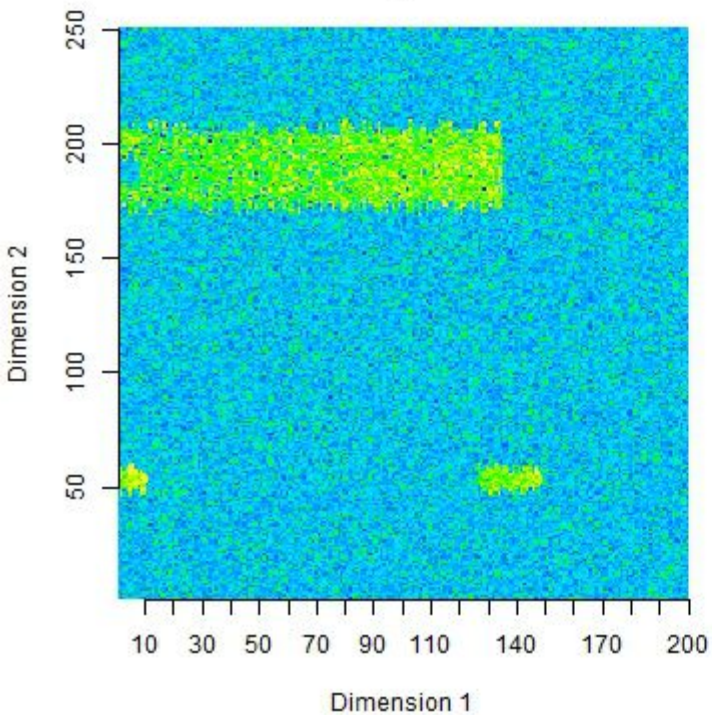

**Events**

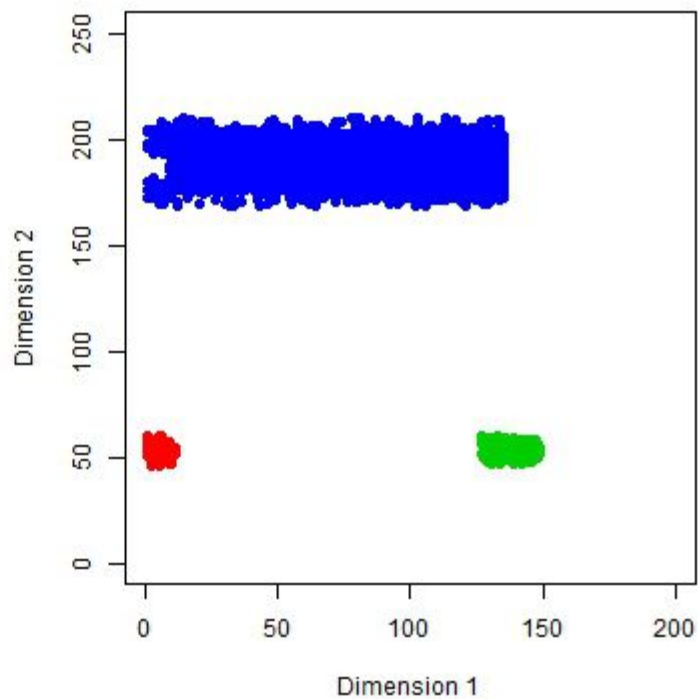

Supplement: S2 (10.1371/journal.pone.0236331.s002) [file journal.pone.0236331.s002]

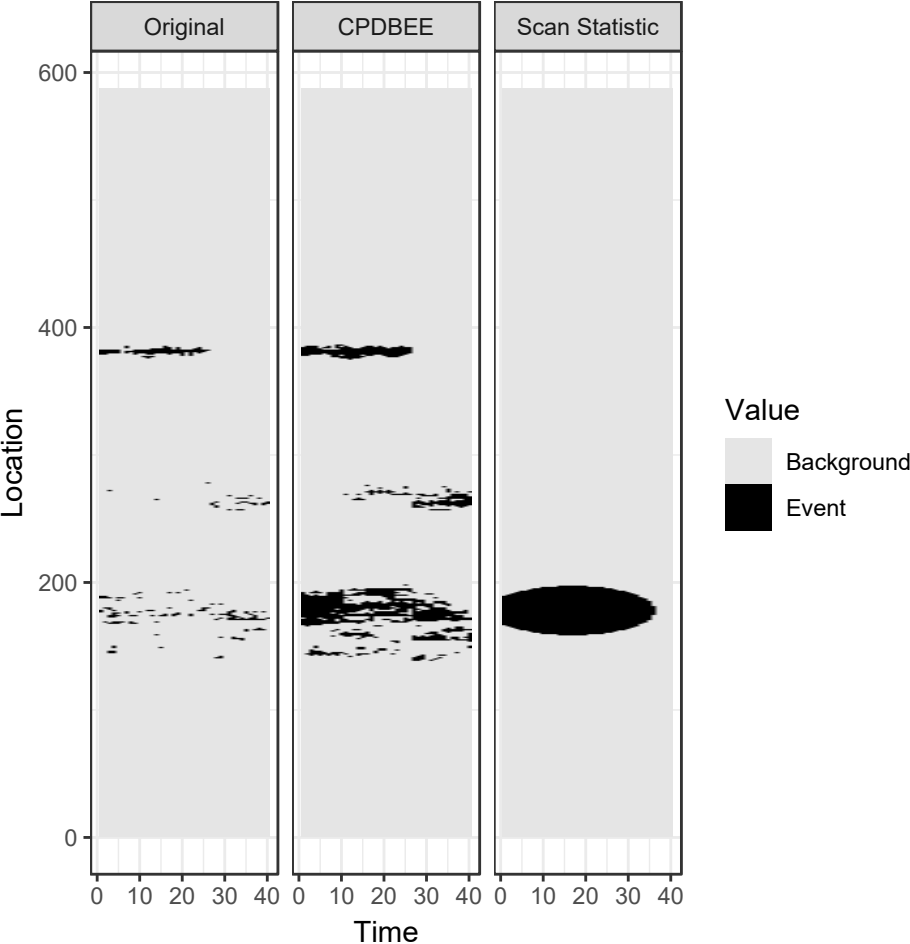

Supplement: S2 (10.1371/journal.pone.0236331.s002) [file journal.pone.0236331.s002]

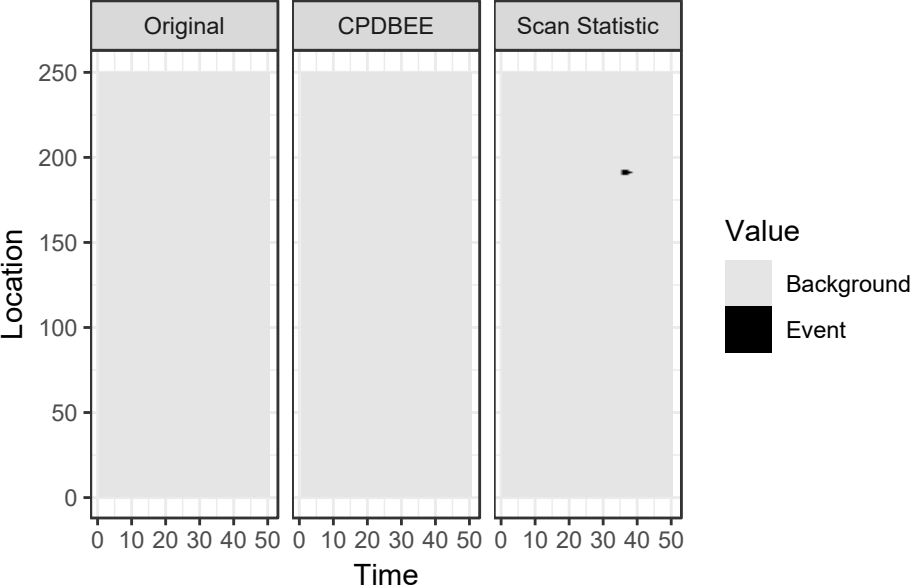

Supplement: S2 (10.1371/journal.pone.0236331.s002) [file journal.pone.0236331.s002]
